# Supplementary material for: A Statistical Evaluation of Methods of In-Vitro Growth Assessment for Phyllosticta citricarpa: Average Colony Diameter vs. Area
Source: PubMed Central journal article supplement (PMC5268463; doi:10.1371/journal.pone.0170755), 2017-01-26
Supplement: pone.0170755.s001.pdf [file pone.0170755.s001.pdf]

**S1. Table. Data set for the in-vitro growth assessment for *Phyllosticta citricarpa*: Average Colony Diameter vs. Area**

| Day | Rep | Isolate no. | Fungicide ppm (µg/ml) | Plate | M <sub>A</sub> | D <sub>A</sub> |
|-----|-----|-------------|-----------------------|-------|----------------|----------------|
| 7   | 1   | 2010_01     | 0.0                   | 1     | 547.56         | 1463.03        |
| 7   | 1   | 2010_01     | 0.0                   | 2     | 552.05         | 1559.48        |
| 7   | 1   | 2010_01     | 0.1                   | 1     | 36.20          | 37.83          |
| 7   | 1   | 2010_01     | 0.1                   | 2     | 45.56          | 33.29          |
| 7   | 1   | 2010_01     | 1.0                   | 1     | 13.13          | 2.81           |
| 7   | 1   | 2010_01     | 1.0                   | 2     | 9.89           | 3.30           |
| 7   | 1   | 2010_01     | 5.0                   | 1     | 0.49           | 0.05           |
| 7   | 1   | 2010_01     | 5.0                   | 2     | 1.74           | 0.48           |
| 7   | 1   | 2010_01     | 10.0                  | 1     | 0.00           | 0.00           |
| 7   | 1   | 2010_01     | 10.0                  | 2     | 1.00           | 0.08           |
| 7   | 1   | 2010_01     | A                     | 1     | 580.09         | 1577.03        |
| 7   | 1   | 2010_01     | A                     | 2     | 540.02         | 1352.65        |
| 7   | 1   | 2010_03     | 0.0                   | 1     | 319.88         | 806.76         |
| 7   | 1   | 2010_03     | 0.0                   | 2     | 306.17         | 768.96         |
| 7   | 1   | 2010_03     | 0.1                   | 1     | 50.03          | 61.93          |
| 7   | 1   | 2010_03     | 0.1                   | 2     | 45.91          | 41.17          |
| 7   | 1   | 2010_03     | 1.0                   | 1     | 0.74           | 0.06           |
| 7   | 1   | 2010_03     | 1.0                   | 2     | 1.34           | 0.29           |
| 7   | 1   | 2010_03     | 5.0                   | 1     | 0.71           | 0.00           |
| 7   | 1   | 2010_03     | 5.0                   | 2     | 0.00           | 0.00           |
| 7   | 1   | 2010_03     | 10.0                  | 1     | 0.00           | 0.00           |
| 7   | 1   | 2010_03     | 10.0                  | 2     | 0.00           | 0.00           |
| 7   | 1   | 2010_03     | A                     | 1     | 394.12         | 955.53         |
| 7   | 1   | 2010_03     | A                     | 2     | 454.77         | 1202.57        |
| 7   | 1   | 2010_04     | 0.0                   | 1     | 595.22         | 1799.77        |
| 7   | 1   | 2010_04     | 0.0                   | 2     | 488.70         | 1378.19        |
| 7   | 1   | 2010_04     | 0.1                   | 1     | 12.60          | 4.83           |
| 7   | 1   | 2010_04     | 0.1                   | 2     | 18.99          | 5.68           |
| 7   | 1   | 2010_04     | 1.0                   | 1     | 0.00           | 0.00           |
| 7   | 1   | 2010_04     | 1.0                   | 2     | 0.00           | 0.00           |
| 7   | 1   | 2010_04     | 5.0                   | 1     | 0.00           | 0.00           |
| 7   | 1   | 2010_04     | 5.0                   | 2     | 0.00           | 0.00           |
| 7   | 1   | 2010_04     | 10.0                  | 1     | 0.53           | 0.06           |
| 7   | 1   | 2010_04     | 10.0                  | 2     | 0.28           | 0.01           |
| 7   | 1   | 2010_04     | A                     | 1     | 593.77         | 1708.47        |
| 7   | 1   | 2010_04     | A                     | 2     | 603.29         | 1827.70        |

|   |   |         |      |   |        |         |
|---|---|---------|------|---|--------|---------|
| 7 | 1 | 2010_06 | 0.0  | 1 | 412.81 | 949.51  |
| 7 | 1 | 2010_06 | 0.0  | 2 | 424.16 | 1169.00 |
| 7 | 1 | 2010_06 | 0.1  | 1 | 28.23  | 21.65   |
| 7 | 1 | 2010_06 | 0.1  | 2 | 33.06  | 29.61   |
| 7 | 1 | 2010_06 | 1.0  | 1 | 13.67  | 3.94    |
| 7 | 1 | 2010_06 | 1.0  | 2 | 24.41  | 15.83   |
| 7 | 1 | 2010_06 | 5.0  | 1 | 0.00   | 0.00    |
| 7 | 1 | 2010_06 | 5.0  | 2 | 0.00   | 0.00    |
| 7 | 1 | 2010_06 | 10.0 | 1 | 0.00   | 0.00    |
| 7 | 1 | 2010_06 | 10.0 | 2 | 0.00   | 0.00    |
| 7 | 1 | 2010_06 | A    | 1 | 238.15 | 672.88  |
| 7 | 1 | 2010_06 | A    | 2 | 383.98 | 848.57  |
| 7 | 1 | 2010_08 | 0.0  | 1 | 456.07 | 1141.89 |
| 7 | 1 | 2010_08 | 0.0  | 2 | 581.37 | 1606.02 |
| 7 | 1 | 2010_08 | 0.1  | 1 | 34.18  | 25.61   |
| 7 | 1 | 2010_08 | 0.1  | 2 | 32.95  | 30.09   |
| 7 | 1 | 2010_08 | 1.0  | 1 | 9.53   | 2.49    |
| 7 | 1 | 2010_08 | 1.0  | 2 | 11.39  | 4.26    |
| 7 | 1 | 2010_08 | 5.0  | 1 | 0.00   | 0.00    |
| 7 | 1 | 2010_08 | 5.0  | 2 | 0.00   | 0.00    |
| 7 | 1 | 2010_08 | 10.0 | 1 | 0.00   | 0.00    |
| 7 | 1 | 2010_08 | 10.0 | 2 | 0.53   | 0.02    |
| 7 | 1 | 2010_08 | A    | 1 | 507.56 | 1414.62 |
| 7 | 1 | 2010_08 | A    | 2 | 489.17 | 1138.90 |
| 7 | 1 | 2010_10 | 0.0  | 1 | 243.56 | 483.83  |
| 7 | 1 | 2010_10 | 0.0  | 2 | 236.79 | 627.68  |
| 7 | 1 | 2010_10 | 0.1  | 1 | 20.85  | 16.69   |
| 7 | 1 | 2010_10 | 0.1  | 2 | 23.01  | 10.93   |
| 7 | 1 | 2010_10 | 1.0  | 1 | 5.63   | 0.31    |
| 7 | 1 | 2010_10 | 1.0  | 2 | 8.33   | 0.82    |
| 7 | 1 | 2010_10 | 5.0  | 1 | 0.00   | 0.00    |
| 7 | 1 | 2010_10 | 5.0  | 2 | 0.00   | 0.00    |
| 7 | 1 | 2010_10 | 10.0 | 1 | 0.00   | 0.00    |
| 7 | 1 | 2010_10 | 10.0 | 2 | 0.00   | 0.00    |
| 7 | 1 | 2010_10 | A    | 1 | 132.47 | 340.12  |
| 7 | 1 | 2010_10 | A    | 2 | 276.55 | 641.08  |
| 7 | 1 | 2011_02 | 0.0  | 1 | 551.54 | 2725.64 |
| 7 | 1 | 2011_02 | 0.0  | 2 | 491.51 | 1578.44 |
| 7 | 1 | 2011_02 | 0.1  | 1 | 34.55  | 27.62   |
| 7 | 1 | 2011_02 | 0.1  | 2 | 42.92  | 33.90   |
| 7 | 1 | 2011_02 | 1.0  | 1 | 10.26  | 2.99    |

|   |   |         |      |   |        |         |
|---|---|---------|------|---|--------|---------|
| 7 | 1 | 2011_02 | 1.0  | 2 | 9.58   | 4.26    |
| 7 | 1 | 2011_02 | 5.0  | 1 | 0.00   | 0.00    |
| 7 | 1 | 2011_02 | 5.0  | 2 | 0.00   | 0.00    |
| 7 | 1 | 2011_02 | 10.0 | 1 | 1.01   | 0.03    |
| 7 | 1 | 2011_02 | 10.0 | 2 | 0.53   | 0.06    |
| 7 | 1 | 2011_02 | A    | 1 | 516.35 | 1578.44 |
| 7 | 1 | 2011_02 | A    | 2 | 638.64 | 2070.96 |
| 7 | 1 | 2011_15 | 0.0  | 1 | 274.45 | 690.00  |
| 7 | 1 | 2011_15 | 0.0  | 2 | 327.61 | 920.78  |
| 7 | 1 | 2011_15 | 0.1  | 1 | 29.77  | 17.80   |
| 7 | 1 | 2011_15 | 0.1  | 2 | 31.86  | 22.56   |
| 7 | 1 | 2011_15 | 1.0  | 1 | 10.31  | 3.98    |
| 7 | 1 | 2011_15 | 1.0  | 2 | 9.66   | 2.24    |
| 7 | 1 | 2011_15 | 5.0  | 1 | 0.86   | 0.05    |
| 7 | 1 | 2011_15 | 5.0  | 2 | 0.00   | 0.00    |
| 7 | 1 | 2011_15 | 10.0 | 1 | 0.00   | 0.00    |
| 7 | 1 | 2011_15 | 10.0 | 2 | 0.25   | 0.01    |
| 7 | 1 | 2011_15 | A    | 1 | 568.41 | 1996.62 |
| 7 | 1 | 2011_15 | A    | 2 | 450.67 | 1305.48 |
| 7 | 1 | 2011_63 | 0.0  | 1 | 531.81 | 1386.76 |
| 7 | 1 | 2011_63 | 0.0  | 2 | 478.75 | 1223.56 |
| 7 | 1 | 2011_63 | 0.1  | 1 | 61.03  | 75.58   |
| 7 | 1 | 2011_63 | 0.1  | 2 | 56.86  | 74.20   |
| 7 | 1 | 2011_63 | 1.0  | 1 | 27.32  | 20.35   |
| 7 | 1 | 2011_63 | 1.0  | 2 | 26.32  | 20.67   |
| 7 | 1 | 2011_63 | 5.0  | 1 | 0.00   | 0.00    |
| 7 | 1 | 2011_63 | 5.0  | 2 | 5.01   | 0.80    |
| 7 | 1 | 2011_63 | 10.0 | 1 | 0.00   | 0.00    |
| 7 | 1 | 2011_63 | 10.0 | 2 | 0.00   | 0.00    |
| 7 | 1 | 2011_63 | A    | 1 | 408.09 | 1155.71 |
| 7 | 1 | 2011_63 | A    | 2 | 481.57 | 1437.38 |
| 7 | 1 | 2011_67 | 0.0  | 1 | 651.44 | 1857.37 |
| 7 | 1 | 2011_67 | 0.0  | 2 | 587.63 | 1939.22 |
| 7 | 1 | 2011_67 | 0.1  | 1 | 34.01  | 27.06   |
| 7 | 1 | 2011_67 | 0.1  | 2 | 38.23  | 29.90   |
| 7 | 1 | 2011_67 | 1.0  | 1 | 17.59  | 8.40    |
| 7 | 1 | 2011_67 | 1.0  | 2 | 14.18  | 4.56    |
| 7 | 1 | 2011_67 | 5.0  | 1 | 0.01   | 0.06    |
| 7 | 1 | 2011_67 | 5.0  | 2 | 0.53   | 0.01    |
| 7 | 1 | 2011_67 | 10.0 | 1 | 0.00   | 0.00    |
| 7 | 1 | 2011_67 | 10.0 | 2 | 0.53   | 0.00    |

|   |   |          |      |   |         |         |
|---|---|----------|------|---|---------|---------|
| 7 | 1 | 2011_67  | A    | 1 | 554.86  | 1820.88 |
| 7 | 1 | 2011_67  | A    | 2 | 591.62  | 1952.52 |
| 7 | 1 | 2011_88  | 0.0  | 1 | 1027.79 | 3499.39 |
| 7 | 1 | 2011_88  | 0.0  | 2 | 1061.35 | 3743.62 |
| 7 | 1 | 2011_88  | 0.1  | 1 | 26.59   | 18.63   |
| 7 | 1 | 2011_88  | 0.1  | 2 | 31.74   | 20.91   |
| 7 | 1 | 2011_88  | 1.0  | 1 | 18.75   | 12.19   |
| 7 | 1 | 2011_88  | 1.0  | 2 | 13.94   | 7.50    |
| 7 | 1 | 2011_88  | 5.0  | 1 | 0.00    | 0.00    |
| 7 | 1 | 2011_88  | 5.0  | 2 | 0.00    | 0.00    |
| 7 | 1 | 2011_88  | 10.0 | 1 | 0.00    | 0.00    |
| 7 | 1 | 2011_88  | 10.0 | 2 | 0.00    | 0.00    |
| 7 | 1 | 2011_88  | A    | 1 | 1062.61 | 3263.40 |
| 7 | 1 | 2011_88  | A    | 2 | 835.51  | 2769.30 |
| 7 | 1 | 2012_051 | 0.0  | 1 | 315.11  | 911.66  |
| 7 | 1 | 2012_051 | 0.0  | 2 | 270.04  | 792.73  |
| 7 | 1 | 2012_051 | 0.1  | 1 | 36.43   | 22.56   |
| 7 | 1 | 2012_051 | 0.1  | 2 | 39.90   | 29.90   |
| 7 | 1 | 2012_051 | 1.0  | 1 | 10.15   | 2.60    |
| 7 | 1 | 2012_051 | 1.0  | 2 | 11.51   | 2.72    |
| 7 | 1 | 2012_051 | 5.0  | 1 | 0.54    | 0.02    |
| 7 | 1 | 2012_051 | 5.0  | 2 | 0.00    | 0.00    |
| 7 | 1 | 2012_051 | 10.0 | 1 | 0.00    | 0.00    |
| 7 | 1 | 2012_051 | 10.0 | 2 | 1.51    | 0.08    |
| 7 | 1 | 2012_051 | A    | 1 | 417.17  | 1238.48 |
| 7 | 1 | 2012_051 | A    | 2 | 186.48  | 422.37  |
| 7 | 1 | 2012_086 | 0.0  | 1 | 538.13  | 1824.67 |
| 7 | 1 | 2012_086 | 0.0  | 2 | 562.06  | 1722.42 |
| 7 | 1 | 2012_086 | 0.1  | 1 | 35.04   | 33.29   |
| 7 | 1 | 2012_086 | 0.1  | 2 | 28.72   | 21.48   |
| 7 | 1 | 2012_086 | 1.0  | 1 | 4.17    | 0.92    |
| 7 | 1 | 2012_086 | 1.0  | 2 | 2.24    | 0.34    |
| 7 | 1 | 2012_086 | 5.0  | 1 | 0.28    | 0.03    |
| 7 | 1 | 2012_086 | 5.0  | 2 | 0.02    | 0.00    |
| 7 | 1 | 2012_086 | 10.0 | 1 | 0.00    | 0.00    |
| 7 | 1 | 2012_086 | 10.0 | 2 | 0.00    | 0.00    |
| 7 | 1 | 2012_086 | A    | 1 | 514.82  | 1653.96 |
| 7 | 1 | 2012_086 | A    | 2 | 414.50  | 1389.40 |
| 7 | 1 | 2012_117 | 0.0  | 1 | 617.30  | 1533.69 |
| 7 | 1 | 2012_117 | 0.0  | 2 | 675.96  | 1980.02 |
| 7 | 1 | 2012_117 | 0.1  | 1 | 44.21   | 32.88   |

|   |   |          |      |   |        |         |
|---|---|----------|------|---|--------|---------|
| 7 | 1 | 2012_117 | 0.1  | 2 | 52.21  | 52.94   |
| 7 | 1 | 2012_117 | 1.0  | 1 | 26.28  | 15.00   |
| 7 | 1 | 2012_117 | 1.0  | 2 | 23.88  | 10.24   |
| 7 | 1 | 2012_117 | 5.0  | 1 | 8.08   | 4.56    |
| 7 | 1 | 2012_117 | 5.0  | 2 | 3.59   | 2.60    |
| 7 | 1 | 2012_117 | 10.0 | 1 | 0.02   | 0.00    |
| 7 | 1 | 2012_117 | 10.0 | 2 | 0.00   | 0.00    |
| 7 | 1 | 2012_117 | A    | 1 | 469.14 | 1214.89 |
| 7 | 1 | 2012_117 | A    | 2 | 499.60 | 1386.76 |
| 7 | 1 | 2012_125 | 0.0  | 1 | 429.13 | 1190.92 |
| 7 | 1 | 2012_125 | 0.0  | 2 | 400.71 | 1330.58 |
| 7 | 1 | 2012_125 | 0.1  | 1 | 39.37  | 39.26   |
| 7 | 1 | 2012_125 | 0.1  | 2 | 45.56  | 45.13   |
| 7 | 1 | 2012_125 | 1.0  | 1 | 16.71  | 6.33    |
| 7 | 1 | 2012_125 | 1.0  | 2 | 17.53  | 9.73    |
| 7 | 1 | 2012_125 | 5.0  | 1 | 0.00   | 0.00    |
| 7 | 1 | 2012_125 | 5.0  | 2 | 0.00   | 0.00    |
| 7 | 1 | 2012_125 | 10.0 | 1 | 0.00   | 0.00    |
| 7 | 1 | 2012_125 | 10.0 | 2 | 0.54   | 0.08    |
| 7 | 1 | 2012_125 | A    | 1 | 372.23 | 1032.06 |
| 7 | 1 | 2012_125 | A    | 2 | 448.65 | 1281.26 |
| 7 | 1 | 2012_135 | 0.0  | 1 | 185.60 | 502.33  |
| 7 | 1 | 2012_135 | 0.0  | 2 | 216.54 | 438.55  |
| 7 | 1 | 2012_135 | 0.1  | 1 | 38.34  | 32.37   |
| 7 | 1 | 2012_135 | 0.1  | 2 | 38.52  | 30.29   |
| 7 | 1 | 2012_135 | 1.0  | 1 | 18.65  | 11.46   |
| 7 | 1 | 2012_135 | 1.0  | 2 | 20.87  | 10.99   |
| 7 | 1 | 2012_135 | 5.0  | 1 | 0.53   | 0.07    |
| 7 | 1 | 2012_135 | 5.0  | 2 | 0.00   | 0.00    |
| 7 | 1 | 2012_135 | 10.0 | 1 | 0.00   | 0.00    |
| 7 | 1 | 2012_135 | 10.0 | 2 | 0.52   | 0.11    |
| 7 | 1 | 2012_135 | A    | 1 | 198.12 | 408.64  |
| 7 | 1 | 2012_135 | A    | 2 | 191.76 | 443.01  |
| 7 | 1 | 2013_01  | 0.0  | 1 | 299.43 | 709.69  |
| 7 | 1 | 2013_01  | 0.0  | 2 | 479.59 | 1778.03 |
| 7 | 1 | 2013_01  | 0.1  | 1 | 23.71  | 14.39   |
| 7 | 1 | 2013_01  | 0.1  | 2 | 32.08  | 31.37   |
| 7 | 1 | 2013_01  | 1.0  | 1 | 11.45  | 2.35    |
| 7 | 1 | 2013_01  | 1.0  | 2 | 12.54  | 3.91    |
| 7 | 1 | 2013_01  | 5.0  | 1 | 0.28   | 0.03    |
| 7 | 1 | 2013_01  | 5.0  | 2 | 0.00   | 0.00    |

|   |   |         |      |   |        |         |
|---|---|---------|------|---|--------|---------|
| 7 | 1 | 2013_01 | 10.0 | 1 | 0.54   | 0.00    |
| 7 | 1 | 2013_01 | 10.0 | 2 | 0.00   | 0.00    |
| 7 | 1 | 2013_01 | A    | 1 | 662.50 | 1980.81 |
| 7 | 1 | 2013_01 | A    | 2 | 271.07 | 765.03  |
| 7 | 1 | 2013_03 | 0.0  | 1 | 532.43 | 1721.68 |
| 7 | 1 | 2013_03 | 0.0  | 2 | 445.59 | 1193.98 |
| 7 | 1 | 2013_03 | 0.1  | 1 | 18.69  | 13.01   |
| 7 | 1 | 2013_03 | 0.1  | 2 | 23.51  | 15.21   |
| 7 | 1 | 2013_03 | 1.0  | 1 | 14.36  | 7.89    |
| 7 | 1 | 2013_03 | 1.0  | 2 | 6.98   | 2.69    |
| 7 | 1 | 2013_03 | 5.0  | 1 | 1.75   | 0.16    |
| 7 | 1 | 2013_03 | 5.0  | 2 | 0.00   | 0.00    |
| 7 | 1 | 2013_03 | 10.0 | 1 | 0.53   | 0.06    |
| 7 | 1 | 2013_03 | 10.0 | 2 | 0.00   | 0.00    |
| 7 | 1 | 2013_03 | A    | 1 | 597.19 | 1958.00 |
| 7 | 1 | 2013_03 | A    | 2 | 536.38 | 1574.92 |
| 7 | 1 | 2013_04 | 0.0  | 1 | 534.33 | 1852.79 |
| 7 | 1 | 2013_04 | 0.0  | 2 | 608.93 | 1769.07 |
| 7 | 1 | 2013_04 | 0.1  | 1 | 39.96  | 37.18   |
| 7 | 1 | 2013_04 | 0.1  | 2 | 40.11  | 42.31   |
| 7 | 1 | 2013_04 | 1.0  | 1 | 12.03  | 5.23    |
| 7 | 1 | 2013_04 | 1.0  | 2 | 15.91  | 6.47    |
| 7 | 1 | 2013_04 | 5.0  | 1 | 7.53   | 1.70    |
| 7 | 1 | 2013_04 | 5.0  | 2 | 7.08   | 1.41    |
| 7 | 1 | 2013_04 | 10.0 | 1 | 0.00   | 0.00    |
| 7 | 1 | 2013_04 | 10.0 | 2 | 0.00   | 0.00    |
| 7 | 1 | 2013_04 | A    | 1 | 283.13 | 830.60  |
| 7 | 1 | 2013_04 | A    | 2 | 567.84 | 1845.93 |
| 7 | 1 | 2013_11 | 0.0  | 1 | 517.66 | 1417.29 |
| 7 | 1 | 2013_11 | 0.0  | 2 | 690.94 | 2174.66 |
| 7 | 1 | 2013_11 | 0.1  | 1 | 34.05  | 27.15   |
| 7 | 1 | 2013_11 | 0.1  | 2 | 45.47  | 42.08   |
| 7 | 1 | 2013_11 | 1.0  | 1 | 11.13  | 3.63    |
| 7 | 1 | 2013_11 | 1.0  | 2 | 6.85   | 1.89    |
| 7 | 1 | 2013_11 | 5.0  | 1 | 0.00   | 0.00    |
| 7 | 1 | 2013_11 | 5.0  | 2 | 0.00   | 0.00    |
| 7 | 1 | 2013_11 | 10.0 | 1 | 0.75   | 0.08    |
| 7 | 1 | 2013_11 | 10.0 | 2 | 0.00   | 0.00    |
| 7 | 1 | 2013_11 | A    | 1 | 610.80 | 2219.52 |
| 7 | 1 | 2013_11 | A    | 2 | 680.65 | 1955.65 |
| 7 | 1 | 2013_18 | 0.0  | 1 | 199.69 | 558.23  |

|   |   |         |      |   |        |         |
|---|---|---------|------|---|--------|---------|
| 7 | 1 | 2013_18 | 0.0  | 2 | 510.68 | 1611.00 |
| 7 | 1 | 2013_18 | 0.1  | 1 | 28.57  | 28.09   |
| 7 | 1 | 2013_18 | 0.1  | 2 | 28.15  | 17.72   |
| 7 | 1 | 2013_18 | 1.0  | 1 | 15.41  | 4.71    |
| 7 | 1 | 2013_18 | 1.0  | 2 | 9.76   | 2.81    |
| 7 | 1 | 2013_18 | 5.0  | 1 | 0.00   | 0.00    |
| 7 | 1 | 2013_18 | 5.0  | 2 | 0.54   | 0.00    |
| 7 | 1 | 2013_18 | 10.0 | 1 | 0.00   | 0.00    |
| 7 | 1 | 2013_18 | 10.0 | 2 | 0.00   | 0.00    |
| 7 | 1 | 2013_18 | A    | 1 | 473.21 | 1273.66 |
| 7 | 1 | 2013_18 | A    | 2 | 504.37 | 1495.07 |
| 7 | 1 | 2013_20 | 0.0  | 1 | 495.48 | 1500.55 |
| 7 | 1 | 2013_20 | 0.0  | 2 | 574.58 | 1661.90 |
| 7 | 1 | 2013_20 | 0.1  | 1 | 41.66  | 36.42   |
| 7 | 1 | 2013_20 | 0.1  | 2 | 34.23  | 19.17   |
| 7 | 1 | 2013_20 | 1.0  | 1 | 14.76  | 3.60    |
| 7 | 1 | 2013_20 | 1.0  | 2 | 13.60  | 4.52    |
| 7 | 1 | 2013_20 | 5.0  | 1 | 0.02   | 0.22    |
| 7 | 1 | 2013_20 | 5.0  | 2 | 0.97   | 0.18    |
| 7 | 1 | 2013_20 | 10.0 | 1 | 0.99   | 0.06    |
| 7 | 1 | 2013_20 | 10.0 | 2 | 1.24   | 0.04    |
| 7 | 1 | 2013_20 | A    | 1 | 483.08 | 1610.28 |
| 7 | 1 | 2013_20 | A    | 2 | 583.87 | 1714.33 |
| 7 | 2 | 2010_01 | 0.0  | 1 | 232.57 | 564.95  |
| 7 | 2 | 2010_01 | 0.0  | 2 | 326.98 | 821.94  |
| 7 | 2 | 2010_01 | 0.1  | 1 | 28.10  | 25.43   |
| 7 | 2 | 2010_01 | 0.1  | 2 | 29.03  | 19.87   |
| 7 | 2 | 2010_01 | 1.0  | 1 | 5.28   | 5.47    |
| 7 | 2 | 2010_01 | 1.0  | 2 | 0.00   | 0.00    |
| 7 | 2 | 2010_01 | 5.0  | 1 | 0.00   | 0.00    |
| 7 | 2 | 2010_01 | 5.0  | 2 | 0.00   | 0.00    |
| 7 | 2 | 2010_01 | 10.0 | 1 | 0.00   | 0.00    |
| 7 | 2 | 2010_01 | 10.0 | 2 | 0.00   | 0.00    |
| 7 | 2 | 2010_01 | A    | 1 | 433.79 | 1152.09 |
| 7 | 2 | 2010_01 | A    | 2 | 334.00 | 1024.67 |
| 7 | 2 | 2010_03 | 0.0  | 1 | 665.67 | 1926.76 |
| 7 | 2 | 2010_03 | 0.0  | 2 | 423.98 | 1087.45 |
| 7 | 2 | 2010_03 | 0.1  | 1 | 65.38  | 65.61   |
| 7 | 2 | 2010_03 | 0.1  | 2 | 67.45  | 72.38   |
| 7 | 2 | 2010_03 | 1.0  | 1 | 0.00   | 0.00    |
| 7 | 2 | 2010_03 | 1.0  | 2 | 0.00   | 0.00    |

|   |   |         |      |   |        |         |
|---|---|---------|------|---|--------|---------|
| 7 | 2 | 2010_03 | 5.0  | 1 | 0.00   | 0.00    |
| 7 | 2 | 2010_03 | 5.0  | 2 | 0.00   | 0.00    |
| 7 | 2 | 2010_03 | 10.0 | 1 | 0.00   | 0.00    |
| 7 | 2 | 2010_03 | 10.0 | 2 | 0.94   | 0.26    |
| 7 | 2 | 2010_03 | A    | 1 | 393.51 | 925.09  |
| 7 | 2 | 2010_03 | A    | 2 | 611.25 | 2570.60 |
| 7 | 2 | 2010_04 | 0.0  | 1 | .      | .       |
| 7 | 2 | 2010_04 | 0.0  | 2 | 102.97 | 174.83  |
| 7 | 2 | 2010_04 | 0.1  | 1 | 13.43  | 5.43    |
| 7 | 2 | 2010_04 | 0.1  | 2 | 21.12  | 13.79   |
| 7 | 2 | 2010_04 | 1.0  | 1 | 0.00   | 0.00    |
| 7 | 2 | 2010_04 | 1.0  | 2 | 0.00   | 0.00    |
| 7 | 2 | 2010_04 | 5.0  | 1 | 0.00   | 0.00    |
| 7 | 2 | 2010_04 | 5.0  | 2 | 0.00   | 0.00    |
| 7 | 2 | 2010_04 | 10.0 | 1 | .      | .       |
| 7 | 2 | 2010_04 | 10.0 | 2 | 0.00   | 0.00    |
| 7 | 2 | 2010_04 | A    | 1 | 302.98 | 731.10  |
| 7 | 2 | 2010_04 | A    | 2 | .      | .       |
| 7 | 2 | 2010_06 | 0.0  | 1 | 246.80 | 299.57  |
| 7 | 2 | 2010_06 | 0.0  | 2 | 360.13 | 513.91  |
| 7 | 2 | 2010_06 | 0.1  | 1 | 31.30  | 25.07   |
| 7 | 2 | 2010_06 | 0.1  | 2 | 39.27  | 39.26   |
| 7 | 2 | 2010_06 | 1.0  | 1 | 0.00   | 0.00    |
| 7 | 2 | 2010_06 | 1.0  | 2 | 0.00   | 0.00    |
| 7 | 2 | 2010_06 | 5.0  | 1 | 0.00   | 0.00    |
| 7 | 2 | 2010_06 | 5.0  | 2 | 0.00   | 0.00    |
| 7 | 2 | 2010_06 | 10.0 | 1 | 12.37  | 0.00    |
| 7 | 2 | 2010_06 | 10.0 | 2 | 0.00   | 0.00    |
| 7 | 2 | 2010_06 | A    | 1 | 509.46 | 848.57  |
| 7 | 2 | 2010_06 | A    | 2 | 401.67 | 586.21  |
| 7 | 2 | 2010_08 | 0.0  | 1 | 393.89 | 1124.58 |
| 7 | 2 | 2010_08 | 0.0  | 2 | 342.87 | 973.14  |
| 7 | 2 | 2010_08 | 0.1  | 1 | 29.24  | 21.57   |
| 7 | 2 | 2010_08 | 0.1  | 2 | 26.68  | 13.79   |
| 7 | 2 | 2010_08 | 1.0  | 1 | 0.00   | 0.00    |
| 7 | 2 | 2010_08 | 1.0  | 2 | 0.00   | 0.00    |
| 7 | 2 | 2010_08 | 5.0  | 1 | 0.00   | 0.00    |
| 7 | 2 | 2010_08 | 5.0  | 2 | 1.42   | 0.02    |
| 7 | 2 | 2010_08 | 10.0 | 1 | 0.25   | 0.00    |
| 7 | 2 | 2010_08 | 10.0 | 2 | 0.00   | 0.00    |
| 7 | 2 | 2010_08 | A    | 1 | 397.13 | 1117.46 |



|   |   |         |      |   |        |         |
|---|---|---------|------|---|--------|---------|
| 7 | 2 | 2010_08 | A    | 2 | 426.99 | 1107.41 |
| 7 | 2 | 2010_10 | 0.0  | 1 | 223.83 | 503.12  |
| 7 | 2 | 2010_10 | 0.0  | 2 | 304.56 | 932.11  |
| 7 | 2 | 2010_10 | 0.1  | 1 | 32.67  | 30.19   |
| 7 | 2 | 2010_10 | 0.1  | 2 | 23.17  | 19.17   |
| 7 | 2 | 2010_10 | 1.0  | 1 | 2.06   | 0.11    |
| 7 | 2 | 2010_10 | 1.0  | 2 | 8.04   | 1.77    |
| 7 | 2 | 2010_10 | 5.0  | 1 | 0.00   | 0.00    |
| 7 | 2 | 2010_10 | 5.0  | 2 | 0.00   | 0.00    |
| 7 | 2 | 2010_10 | 10.0 | 1 | 0.00   | 0.00    |
| 7 | 2 | 2010_10 | 10.0 | 2 | 0.00   | 0.00    |
| 7 | 2 | 2010_10 | A    | 1 | 302.05 | 727.27  |
| 7 | 2 | 2010_10 | A    | 2 | 225.92 | 476.84  |
| 7 | 2 | 2011_02 | 0.0  | 1 | 551.74 | 1724.62 |
| 7 | 2 | 2011_02 | 0.0  | 2 | 688.50 | 2016.47 |
| 7 | 2 | 2011_02 | 0.1  | 1 | 52.22  | 50.27   |
| 7 | 2 | 2011_02 | 0.1  | 2 | 40.34  | 33.08   |
| 7 | 2 | 2011_02 | 1.0  | 1 | 0.25   | 0.05    |
| 7 | 2 | 2011_02 | 1.0  | 2 | 0.00   | 0.00    |
| 7 | 2 | 2011_02 | 5.0  | 1 | 1.17   | 0.07    |
| 7 | 2 | 2011_02 | 5.0  | 2 | 0.24   | 0.14    |
| 7 | 2 | 2011_02 | 10.0 | 1 | 1.91   | 0.31    |
| 7 | 2 | 2011_02 | 10.0 | 2 | 1.42   | 0.20    |
| 7 | 2 | 2011_02 | A    | 1 | 790.55 | 2436.69 |
| 7 | 2 | 2011_02 | A    | 2 | 747.06 | 2296.16 |
| 7 | 2 | 2011_15 | 0.0  | 1 | 374.06 | 996.50  |
| 7 | 2 | 2011_15 | 0.0  | 2 | 367.87 | 1219.22 |
| 7 | 2 | 2011_15 | 0.1  | 1 | 30.48  | 34.42   |
| 7 | 2 | 2011_15 | 0.1  | 2 | 29.66  | 28.18   |
| 7 | 2 | 2011_15 | 1.0  | 1 | 0.00   | 0.00    |
| 7 | 2 | 2011_15 | 1.0  | 2 | 0.00   | 0.00    |
| 7 | 2 | 2011_15 | 5.0  | 1 | 0.00   | 0.00    |
| 7 | 2 | 2011_15 | 5.0  | 2 | 0.00   | 0.00    |
| 7 | 2 | 2011_15 | 10.0 | 1 | 0.00   | 0.00    |
| 7 | 2 | 2011_15 | 10.0 | 2 | 0.21   | 0.13    |
| 7 | 2 | 2011_15 | A    | 1 | 374.46 | 1034.34 |
| 7 | 2 | 2011_15 | A    | 2 | 240.63 | 699.34  |
| 7 | 2 | 2011_63 | 0.0  | 1 | 240.31 | 489.70  |
| 7 | 2 | 2011_63 | 0.0  | 2 | 257.64 | 572.13  |
| 7 | 2 | 2011_63 | 0.1  | 1 | 29.78  | 26.60   |
| 7 | 2 | 2011_63 | 0.1  | 2 | 30.20  | 31.37   |

|   |   |          |      |   |        |         |
|---|---|----------|------|---|--------|---------|
| 7 | 2 | 2011_63  | 1.0  | 1 | 0.00   | 0.00    |
| 7 | 2 | 2011_63  | 1.0  | 2 | 0.00   | 0.00    |
| 7 | 2 | 2011_63  | 5.0  | 1 | 0.00   | 0.00    |
| 7 | 2 | 2011_63  | 5.0  | 2 | 0.00   | 0.00    |
| 7 | 2 | 2011_63  | 10.0 | 1 | 0.00   | 0.00    |
| 7 | 2 | 2011_63  | 10.0 | 2 | 0.00   | 0.00    |
| 7 | 2 | 2011_63  | A    | 1 | 314.35 | 871.97  |
| 7 | 2 | 2011_63  | A    | 2 | 280.91 | 679.33  |
| 7 | 2 | 2011_67  | 0.0  | 1 | 307.28 | 843.42  |
| 7 | 2 | 2011_67  | 0.0  | 2 | 347.88 | 968.72  |
| 7 | 2 | 2011_67  | 0.1  | 1 | 38.00  | 24.37   |
| 7 | 2 | 2011_67  | 0.1  | 2 | 32.63  | 27.06   |
| 7 | 2 | 2011_67  | 1.0  | 1 | 0.00   | 0.00    |
| 7 | 2 | 2011_67  | 1.0  | 2 | 0.00   | 0.00    |
| 7 | 2 | 2011_67  | 5.0  | 1 | 0.00   | 0.00    |
| 7 | 2 | 2011_67  | 5.0  | 2 | 0.00   | 0.00    |
| 7 | 2 | 2011_67  | 10.0 | 1 | 0.00   | 0.00    |
| 7 | 2 | 2011_67  | 10.0 | 2 | 0.00   | 0.00    |
| 7 | 2 | 2011_67  | A    | 1 | 188.45 | 387.42  |
| 7 | 2 | 2011_67  | A    | 2 | 372.91 | 1107.41 |
| 7 | 2 | 2011_88  | 0.0  | 1 | 621.71 | 1849.74 |
| 7 | 2 | 2011_88  | 0.0  | 2 | 628.07 | 1805.04 |
| 7 | 2 | 2011_88  | 0.1  | 1 | 11.34  | 4.95    |
| 7 | 2 | 2011_88  | 0.1  | 2 | 14.80  | 8.81    |
| 7 | 2 | 2011_88  | 1.0  | 1 | 0.00   | 0.00    |
| 7 | 2 | 2011_88  | 1.0  | 2 | 0.00   | 0.00    |
| 7 | 2 | 2011_88  | 5.0  | 1 | 0.00   | 0.00    |
| 7 | 2 | 2011_88  | 5.0  | 2 | 0.00   | 0.00    |
| 7 | 2 | 2011_88  | 10.0 | 1 | 1.42   | 0.05    |
| 7 | 2 | 2011_88  | 10.0 | 2 | 0.00   | 0.00    |
| 7 | 2 | 2011_88  | A    | 1 | 466.60 | 1187.86 |
| 7 | 2 | 2011_88  | A    | 2 | 669.07 | 2179.62 |
| 7 | 2 | 2012_051 | 0.0  | 1 | 271.86 | 617.07  |
| 7 | 2 | 2012_051 | 0.0  | 2 | 276.47 | 919.17  |
| 7 | 2 | 2012_051 | 0.1  | 1 | 37.29  | 41.85   |
| 7 | 2 | 2012_051 | 0.1  | 2 | 27.74  | 21.73   |
| 7 | 2 | 2012_051 | 1.0  | 1 | 0.00   | 0.00    |
| 7 | 2 | 2012_051 | 1.0  | 2 | 0.66   | 0.10    |
| 7 | 2 | 2012_051 | 5.0  | 1 | 0.16   | 0.03    |
| 7 | 2 | 2012_051 | 5.0  | 2 | 1.36   | 0.02    |
| 7 | 2 | 2012_051 | 10.0 | 1 | 0.14   | 0.13    |

|   |   |          |      |   |        |         |
|---|---|----------|------|---|--------|---------|
| 7 | 2 | 2012_051 | 10.0 | 2 | 0.15   | 0.01    |
| 7 | 2 | 2012_051 | A    | 1 | 529.96 | 1364.41 |
| 7 | 2 | 2012_051 | A    | 2 | 460.80 | 1111.55 |
| 7 | 2 | 2012_086 | 0.0  | 1 | 512.82 | 1547.61 |
| 7 | 2 | 2012_086 | 0.0  | 2 | .      | .       |
| 7 | 2 | 2012_086 | 0.1  | 1 | 21.40  | 12.57   |
| 7 | 2 | 2012_086 | 0.1  | 2 | 28.40  | 18.40   |
| 7 | 2 | 2012_086 | 1.0  | 1 | 11.30  | 2.43    |
| 7 | 2 | 2012_086 | 1.0  | 2 | .      | .       |
| 7 | 2 | 2012_086 | 5.0  | 1 | 0.15   | 0.06    |
| 7 | 2 | 2012_086 | 5.0  | 2 | .      | .       |
| 7 | 2 | 2012_086 | 10.0 | 1 | 2.13   | 0.13    |
| 7 | 2 | 2012_086 | 10.0 | 2 | .      | .       |
| 7 | 2 | 2012_086 | A    | 1 | 545.42 | 1628.12 |
| 7 | 2 | 2012_086 | A    | 2 | .      | .       |
| 7 | 2 | 2012_117 | 0.0  | 1 | 300.77 | 732.05  |
| 7 | 2 | 2012_117 | 0.0  | 2 | 280.21 | 785.76  |
| 7 | 2 | 2012_117 | 0.1  | 1 | 18.03  | 14.52   |
| 7 | 2 | 2012_117 | 0.1  | 2 | 18.08  | 9.79    |
| 7 | 2 | 2012_117 | 1.0  | 1 | 0.66   | 0.00    |
| 7 | 2 | 2012_117 | 1.0  | 2 | 0.00   | 0.00    |
| 7 | 2 | 2012_117 | 5.0  | 1 | 0.00   | 0.00    |
| 7 | 2 | 2012_117 | 5.0  | 2 | 0.66   | 0.04    |
| 7 | 2 | 2012_117 | 10.0 | 1 | 1.85   | 0.01    |
| 7 | 2 | 2012_117 | 10.0 | 2 | 1.84   | 0.10    |
| 7 | 2 | 2012_117 | A    | 1 | 431.09 | 1227.28 |
| 7 | 2 | 2012_117 | A    | 2 | 516.12 | 1526.76 |
| 7 | 2 | 2012_125 | 0.0  | 1 | 175.24 | 394.79  |
| 7 | 2 | 2012_125 | 0.0  | 2 | 187.80 | 394.79  |
| 7 | 2 | 2012_125 | 0.1  | 1 | 41.65  | 37.07   |
| 7 | 2 | 2012_125 | 0.1  | 2 | 39.21  | 30.09   |
| 7 | 2 | 2012_125 | 1.0  | 1 | 0.16   | 0.08    |
| 7 | 2 | 2012_125 | 1.0  | 2 | 2.38   | 0.02    |
| 7 | 2 | 2012_125 | 5.0  | 1 | 0.00   | 0.00    |
| 7 | 2 | 2012_125 | 5.0  | 2 | 2.60   | 0.30    |
| 7 | 2 | 2012_125 | 10.0 | 1 | 2.37   | 0.59    |
| 7 | 2 | 2012_125 | 10.0 | 2 | 0.12   | 0.11    |
| 7 | 2 | 2012_125 | A    | 1 | 112.04 | 150.44  |
| 7 | 2 | 2012_125 | A    | 2 | 227.43 | 543.67  |
| 7 | 2 | 2012_135 | 0.0  | 1 | 130.46 | 243.28  |
| 7 | 2 | 2012_135 | 0.0  | 2 | .      | .       |

|   |   |          |      |   |        |         |
|---|---|----------|------|---|--------|---------|
| 7 | 2 | 2012_135 | 0.1  | 1 | 25.66  | 20.03   |
| 7 | 2 | 2012_135 | 0.1  | 2 | 21.36  | 14.79   |
| 7 | 2 | 2012_135 | 1.0  | 1 | 1.12   | 0.26    |
| 7 | 2 | 2012_135 | 1.0  | 2 | .      | .       |
| 7 | 2 | 2012_135 | 5.0  | 1 | 0.65   | 0.03    |
| 7 | 2 | 2012_135 | 5.0  | 2 | .      | .       |
| 7 | 2 | 2012_135 | 10.0 | 1 | 0.00   | 0.00    |
| 7 | 2 | 2012_135 | 10.0 | 2 | .      | .       |
| 7 | 2 | 2012_135 | A    | 1 | 158.71 | 429.69  |
| 7 | 2 | 2012_135 | A    | 2 | .      | .       |
| 7 | 2 | 2013_01  | 0.0  | 1 | 327.18 | 917.02  |
| 7 | 2 | 2013_01  | 0.0  | 2 | 350.20 | 811.30  |
| 7 | 2 | 2013_01  | 0.1  | 1 | 17.95  | 11.04   |
| 7 | 2 | 2013_01  | 0.1  | 2 | 56.95  | 50.39   |
| 7 | 2 | 2013_01  | 1.0  | 1 | 2.10   | 0.04    |
| 7 | 2 | 2013_01  | 1.0  | 2 | 0.15   | 0.06    |
| 7 | 2 | 2013_01  | 5.0  | 1 | 0.00   | 0.00    |
| 7 | 2 | 2013_01  | 5.0  | 2 | 2.84   | 0.05    |
| 7 | 2 | 2013_01  | 10.0 | 1 | 1.36   | 0.03    |
| 7 | 2 | 2013_01  | 10.0 | 2 | 1.12   | 0.06    |
| 7 | 2 | 2013_01  | A    | 1 | 281.01 | 586.21  |
| 7 | 2 | 2013_01  | A    | 2 | 185.99 | 338.82  |
| 7 | 2 | 2013_03  | 0.0  | 1 | 654.88 | 2248.85 |
| 7 | 2 | 2013_03  | 0.0  | 2 | .      | .       |
| 7 | 2 | 2013_03  | 0.1  | 1 | 17.45  | 12.32   |
| 7 | 2 | 2013_03  | 0.1  | 2 | 23.30  | 14.19   |
| 7 | 2 | 2013_03  | 1.0  | 1 | 11.27  | 7.16    |
| 7 | 2 | 2013_03  | 1.0  | 2 | 7.08   | 4.49    |
| 7 | 2 | 2013_03  | 5.0  | 1 | 3.59   | 0.16    |
| 7 | 2 | 2013_03  | 5.0  | 2 | 0.00   | 0.00    |
| 7 | 2 | 2013_03  | 10.0 | 1 | 3.85   | 0.08    |
| 7 | 2 | 2013_03  | 10.0 | 2 | .      | .       |
| 7 | 2 | 2013_03  | A    | 1 | 462.21 | 1403.31 |
| 7 | 2 | 2013_03  | A    | 2 | .      | .       |
| 7 | 2 | 2013_04  | 0.0  | 1 | 581.20 | 1573.51 |
| 7 | 2 | 2013_04  | 0.0  | 2 | 521.58 | 1503.30 |
| 7 | 2 | 2013_04  | 0.1  | 1 | 45.86  | 62.49   |
| 7 | 2 | 2013_04  | 0.1  | 2 | 28.90  | 21.81   |
| 7 | 2 | 2013_04  | 1.0  | 1 | 6.84   | 1.50    |
| 7 | 2 | 2013_04  | 1.0  | 2 | 2.84   | 0.59    |
| 7 | 2 | 2013_04  | 5.0  | 1 | 0.33   | 0.05    |

|   |   |         |      |   |        |         |
|---|---|---------|------|---|--------|---------|
| 7 | 2 | 2013_04 | 5.0  | 2 | 0.00   | 0.00    |
| 7 | 2 | 2013_04 | 10.0 | 1 | 3.07   | 0.10    |
| 7 | 2 | 2013_04 | 10.0 | 2 | 1.11   | 0.38    |
| 7 | 2 | 2013_04 | A    | 1 | 351.07 | 941.33  |
| 7 | 2 | 2013_04 | A    | 2 | 445.56 | 1511.56 |
| 7 | 2 | 2013_11 | 0.0  | 1 | 363.38 | 1024.11 |
| 7 | 2 | 2013_11 | 0.0  | 2 | 306.81 | 776.84  |
| 7 | 2 | 2013_11 | 0.1  | 1 | 23.81  | 21.40   |
| 7 | 2 | 2013_11 | 0.1  | 2 | 38.46  | 33.59   |
| 7 | 2 | 2013_11 | 1.0  | 1 | 0.00   | 0.00    |
| 7 | 2 | 2013_11 | 1.0  | 2 | 1.12   | 0.00    |
| 7 | 2 | 2013_11 | 5.0  | 1 | 0.00   | 0.00    |
| 7 | 2 | 2013_11 | 5.0  | 2 | 0.00   | 0.00    |
| 7 | 2 | 2013_11 | 10.0 | 1 | 2.08   | 0.10    |
| 7 | 2 | 2013_11 | 10.0 | 2 | 0.15   | 0.00    |
| 7 | 2 | 2013_11 | A    | 1 | 140.30 | 246.89  |
| 7 | 2 | 2013_11 | A    | 2 | 487.30 | 1375.56 |
| 7 | 2 | 2013_18 | 0.0  | 1 | 535.12 | 1576.33 |
| 7 | 2 | 2013_18 | 0.0  | 2 | 358.50 | 871.44  |
| 7 | 2 | 2013_18 | 0.1  | 1 | 35.67  | 30.97   |
| 7 | 2 | 2013_18 | 0.1  | 2 | 36.01  | 30.97   |
| 7 | 2 | 2013_18 | 1.0  | 1 | 3.31   | 0.38    |
| 7 | 2 | 2013_18 | 1.0  | 2 | 0.00   | 0.00    |
| 7 | 2 | 2013_18 | 5.0  | 1 | 0.00   | 0.00    |
| 7 | 2 | 2013_18 | 5.0  | 2 | 2.10   | 0.26    |
| 7 | 2 | 2013_18 | 10.0 | 1 | 3.05   | 0.49    |
| 7 | 2 | 2013_18 | 10.0 | 2 | 4.61   | 0.01    |
| 7 | 2 | 2013_18 | A    | 1 | 274.66 | 720.11  |
| 7 | 2 | 2013_18 | A    | 2 | 261.57 | 720.11  |
| 7 | 2 | 2013_20 | 0.0  | 1 | 464.18 | 1386.76 |
| 7 | 2 | 2013_20 | 0.0  | 2 | 379.32 | 907.39  |
| 7 | 2 | 2013_20 | 0.1  | 1 | 47.42  | 48.27   |
| 7 | 2 | 2013_20 | 0.1  | 2 | 48.96  | 42.78   |
| 7 | 2 | 2013_20 | 1.0  | 1 | 0.00   | 0.00    |
| 7 | 2 | 2013_20 | 1.0  | 2 | 0.35   | 0.02    |
| 7 | 2 | 2013_20 | 5.0  | 1 | 3.84   | 0.05    |
| 7 | 2 | 2013_20 | 5.0  | 2 | 3.07   | 0.03    |
| 7 | 2 | 2013_20 | 10.0 | 1 | 0.00   | 0.00    |
| 7 | 2 | 2013_20 | 10.0 | 2 | 0.41   | 0.13    |
| 7 | 2 | 2013_20 | A    | 1 | 524.53 | 1624.54 |
| 7 | 2 | 2013_20 | A    | 2 | 437.18 | 1288.25 |

|    |   |         |      |   |         |         |
|----|---|---------|------|---|---------|---------|
| 14 | 1 | 2010_01 | 0.0  | 1 | 787.26  | 2308.07 |
| 14 | 1 | 2010_01 | 0.0  | 2 | 898.57  | 2609.38 |
| 14 | 1 | 2010_01 | 0.1  | 1 | 100.97  | 158.14  |
| 14 | 1 | 2010_01 | 0.1  | 2 | 110.04  | 137.06  |
| 14 | 1 | 2010_01 | 1.0  | 1 | 52.95   | 49.02   |
| 14 | 1 | 2010_01 | 1.0  | 2 | 43.93   | 38.05   |
| 14 | 1 | 2010_01 | 5.0  | 1 | 32.05   | 43.36   |
| 14 | 1 | 2010_01 | 5.0  | 2 | 17.66   | 22.23   |
| 14 | 1 | 2010_01 | 10.0 | 1 | 0.61    | 0.00    |
| 14 | 1 | 2010_01 | 10.0 | 2 | 1.38    | 0.04    |
| 14 | 1 | 2010_01 | A    | 1 | 1071.90 | 3171.91 |
| 14 | 1 | 2010_01 | A    | 2 | 1027.75 | 3104.39 |
| 14 | 1 | 2010_03 | 0.0  | 1 | 818.93  | 2529.42 |
| 14 | 1 | 2010_03 | 0.0  | 2 | 828.61  | 2428.82 |
| 14 | 1 | 2010_03 | 0.1  | 1 | 120.98  | 235.33  |
| 14 | 1 | 2010_03 | 0.1  | 2 | 100.85  | 138.09  |
| 14 | 1 | 2010_03 | 1.0  | 1 | 35.54   | 24.37   |
| 14 | 1 | 2010_03 | 1.0  | 2 | 24.86   | 14.86   |
| 14 | 1 | 2010_03 | 5.0  | 1 | 0.00    | 0.00    |
| 14 | 1 | 2010_03 | 5.0  | 2 | 0.00    | 0.00    |
| 14 | 1 | 2010_03 | 10.0 | 1 | 0.00    | 0.00    |
| 14 | 1 | 2010_03 | 10.0 | 2 | 0.00    | 0.00    |
| 14 | 1 | 2010_03 | A    | 1 | 1084.09 | 3231.08 |
| 14 | 1 | 2010_03 | A    | 2 | 1429.83 | 4176.22 |
| 14 | 1 | 2010_04 | 0.0  | 1 | 1279.33 | 3993.84 |
| 14 | 1 | 2010_04 | 0.0  | 2 | 841.00  | 2428.82 |
| 14 | 1 | 2010_04 | 0.1  | 1 | 75.35   | 106.05  |
| 14 | 1 | 2010_04 | 0.1  | 2 | 100.72  | 131.10  |
| 14 | 1 | 2010_04 | 1.0  | 1 | 33.16   | 24.81   |
| 14 | 1 | 2010_04 | 1.0  | 2 | 28.24   | 20.51   |
| 14 | 1 | 2010_04 | 5.0  | 1 | 0.00    | 0.00    |
| 14 | 1 | 2010_04 | 5.0  | 2 | 0.00    | 0.00    |
| 14 | 1 | 2010_04 | 10.0 | 1 | 0.00    | 0.00    |
| 14 | 1 | 2010_04 | 10.0 | 2 | 0.00    | 0.00    |
| 14 | 1 | 2010_04 | A    | 1 | 950.23  | 2551.76 |
| 14 | 1 | 2010_04 | A    | 2 | 957.44  | 3055.21 |
| 14 | 1 | 2010_06 | 0.0  | 1 | 970.28  | 2643.90 |
| 14 | 1 | 2010_06 | 0.0  | 2 | 788.40  | 2312.33 |
| 14 | 1 | 2010_06 | 0.1  | 1 | 90.89   | 129.49  |
| 14 | 1 | 2010_06 | 0.1  | 2 | 97.44   | 141.66  |
| 14 | 1 | 2010_06 | 1.0  | 1 | 61.43   | 69.69   |

|    |   |         |      |   |         |         |
|----|---|---------|------|---|---------|---------|
| 14 | 1 | 2010_06 | 1.0  | 2 | 79.14   | 120.96  |
| 14 | 1 | 2010_06 | 5.0  | 1 | 0.00    | 0.00    |
| 14 | 1 | 2010_06 | 5.0  | 2 | 0.86    | 0.03    |
| 14 | 1 | 2010_06 | 10.0 | 1 | 0.00    | 0.00    |
| 14 | 1 | 2010_06 | 10.0 | 2 | 0.00    | 0.00    |
| 14 | 1 | 2010_06 | A    | 1 | 563.40  | 1639.58 |
| 14 | 1 | 2010_06 | A    | 2 | 904.15  | 2570.60 |
| 14 | 1 | 2010_08 | 0.0  | 1 | 1002.02 | 3196.92 |
| 14 | 1 | 2010_08 | 0.0  | 2 | 1067.88 | 3030.77 |
| 14 | 1 | 2010_08 | 0.1  | 1 | 81.79   | 80.75   |
| 14 | 1 | 2010_08 | 0.1  | 2 | 65.69   | 79.96   |
| 14 | 1 | 2010_08 | 1.0  | 1 | 42.18   | 30.29   |
| 14 | 1 | 2010_08 | 1.0  | 2 | 49.45   | 37.18   |
| 14 | 1 | 2010_08 | 5.0  | 1 | 0.00    | 0.00    |
| 14 | 1 | 2010_08 | 5.0  | 2 | 0.00    | 0.00    |
| 14 | 1 | 2010_08 | 10.0 | 1 | 0.00    | 0.00    |
| 14 | 1 | 2010_08 | 10.0 | 2 | 0.00    | 0.00    |
| 14 | 1 | 2010_08 | A    | 1 | 1013.58 | 3338.76 |
| 14 | 1 | 2010_08 | A    | 2 | 762.28  | 2019.65 |
| 14 | 1 | 2010_10 | 0.0  | 1 | 562.46  | 1333.17 |
| 14 | 1 | 2010_10 | 0.0  | 2 | 592.56  | 1544.82 |
| 14 | 1 | 2010_10 | 0.1  | 1 | 72.22   | 84.79   |
| 14 | 1 | 2010_10 | 0.1  | 2 | 77.96   | 76.67   |
| 14 | 1 | 2010_10 | 1.0  | 1 | 32.30   | 32.78   |
| 14 | 1 | 2010_10 | 1.0  | 2 | 35.35   | 34.94   |
| 14 | 1 | 2010_10 | 5.0  | 1 | 2.32    | 0.05    |
| 14 | 1 | 2010_10 | 5.0  | 2 | 0.00    | 0.00    |
| 14 | 1 | 2010_10 | 10.0 | 1 | 0.00    | 0.00    |
| 14 | 1 | 2010_10 | 10.0 | 2 | 0.00    | 0.00    |
| 14 | 1 | 2010_10 | A    | 1 | 345.41  | 702.62  |
| 14 | 1 | 2010_10 | A    | 2 | 716.07  | 2338.83 |
| 14 | 1 | 2011_02 | 0.0  | 1 | 1144.57 | 4492.40 |
| 14 | 1 | 2011_02 | 0.0  | 2 | 1025.90 | 3235.11 |
| 14 | 1 | 2011_02 | 0.1  | 1 | 94.96   | 127.08  |
| 14 | 1 | 2011_02 | 0.1  | 2 | 98.53   | 140.19  |
| 14 | 1 | 2011_02 | 1.0  | 1 | 26.38   | 26.88   |
| 14 | 1 | 2011_02 | 1.0  | 2 | 27.04   | 15.55   |
| 14 | 1 | 2011_02 | 5.0  | 1 | 9.83    | 2.93    |
| 14 | 1 | 2011_02 | 5.0  | 2 | 0.00    | 0.00    |
| 14 | 1 | 2011_02 | 10.0 | 1 | 0.15    | 0.17    |
| 14 | 1 | 2011_02 | 10.0 | 2 | 0.12    | 0.02    |

|    |   |         |      |   |         |         |
|----|---|---------|------|---|---------|---------|
| 14 | 1 | 2011_02 | A    | 1 | 1188.70 | 3989.36 |
| 14 | 1 | 2011_02 | A    | 2 | 1224.66 | 3923.58 |
| 14 | 1 | 2011_15 | 0.0  | 1 | 624.06  | 1594.68 |
| 14 | 1 | 2011_15 | 0.0  | 2 | 705.83  | 2533.88 |
| 14 | 1 | 2011_15 | 0.1  | 1 | 83.92   | 82.68   |
| 14 | 1 | 2011_15 | 0.1  | 2 | 91.62   | 127.88  |
| 14 | 1 | 2011_15 | 1.0  | 1 | 43.78   | 23.16   |
| 14 | 1 | 2011_15 | 1.0  | 2 | 53.00   | 48.40   |
| 14 | 1 | 2011_15 | 5.0  | 1 | 0.00    | 0.00    |
| 14 | 1 | 2011_15 | 5.0  | 2 | 0.00    | 0.00    |
| 14 | 1 | 2011_15 | 10.0 | 1 | 0.00    | 0.00    |
| 14 | 1 | 2011_15 | 10.0 | 2 | 0.00    | 0.00    |
| 14 | 1 | 2011_15 | A    | 1 | 1114.47 | 3535.13 |
| 14 | 1 | 2011_15 | A    | 2 | 888.74  | 2742.32 |
| 14 | 1 | 2011_63 | 0.0  | 1 | 1164.16 | 3606.09 |
| 14 | 1 | 2011_63 | 0.0  | 2 | 1144.33 | 3333.64 |
| 14 | 1 | 2011_63 | 0.1  | 1 | 165.39  | 288.63  |
| 14 | 1 | 2011_63 | 0.1  | 2 | 175.38  | 322.70  |
| 14 | 1 | 2011_63 | 1.0  | 1 | 85.12   | 127.88  |
| 14 | 1 | 2011_63 | 1.0  | 2 | 97.21   | 141.03  |
| 14 | 1 | 2011_63 | 5.0  | 1 | 12.64   | 6.74    |
| 14 | 1 | 2011_63 | 5.0  | 2 | 24.59   | 23.16   |
| 14 | 1 | 2011_63 | 10.0 | 1 | 0.00    | 0.00    |
| 14 | 1 | 2011_63 | 10.0 | 2 | 0.00    | 0.00    |
| 14 | 1 | 2011_63 | A    | 1 | 1095.46 | 3341.83 |
| 14 | 1 | 2011_63 | A    | 2 | 957.18  | 2972.50 |
| 14 | 1 | 2011_67 | 0.0  | 1 | 1523.72 | 4931.50 |
| 14 | 1 | 2011_67 | 0.0  | 2 | 1023.70 | 3138.06 |
| 14 | 1 | 2011_67 | 0.1  | 1 | 102.26  | 130.50  |
| 14 | 1 | 2011_67 | 0.1  | 2 | 106.38  | 122.91  |
| 14 | 1 | 2011_67 | 1.0  | 1 | 50.05   | 50.77   |
| 14 | 1 | 2011_67 | 1.0  | 2 | 57.32   | 50.14   |
| 14 | 1 | 2011_67 | 5.0  | 1 | 0.00    | 0.00    |
| 14 | 1 | 2011_67 | 5.0  | 2 | 0.00    | 0.00    |
| 14 | 1 | 2011_67 | 10.0 | 1 | 0.00    | 0.00    |
| 14 | 1 | 2011_67 | 10.0 | 2 | 0.00    | 0.00    |
| 14 | 1 | 2011_67 | A    | 1 | 1346.40 | 4292.71 |
| 14 | 1 | 2011_67 | A    | 2 | 970.59  | 3130.12 |
| 14 | 1 | 2011_88 | 0.0  | 1 | 1906.35 | 6546.84 |
| 14 | 1 | 2011_88 | 0.0  | 2 | 1967.67 | 6254.74 |
| 14 | 1 | 2011_88 | 0.1  | 1 | 86.55   | 114.04  |



|    |   |          |      |   |         |         |
|----|---|----------|------|---|---------|---------|
| 14 | 1 | 2011_88  | 0.1  | 2 | 105.76  | 131.31  |
| 14 | 1 | 2011_88  | 1.0  | 1 | 81.00   | 108.43  |
| 14 | 1 | 2011_88  | 1.0  | 2 | 58.69   | 76.82   |
| 14 | 1 | 2011_88  | 5.0  | 1 | 0.27    | 0.00    |
| 14 | 1 | 2011_88  | 5.0  | 2 | 0.00    | 0.00    |
| 14 | 1 | 2011_88  | 10.0 | 1 | 0.00    | 0.00    |
| 14 | 1 | 2011_88  | 10.0 | 2 | 0.00    | 0.00    |
| 14 | 1 | 2011_88  | A    | 1 | 1840.90 | 6535.37 |
| 14 | 1 | 2011_88  | A    | 2 | 1755.35 | 5784.51 |
| 14 | 1 | 2012_051 | 0.0  | 1 | 732.80  | 2060.48 |
| 14 | 1 | 2012_051 | 0.0  | 2 | 635.85  | 1760.88 |
| 14 | 1 | 2012_051 | 0.1  | 1 | 81.05   | 112.34  |
| 14 | 1 | 2012_051 | 0.1  | 2 | 96.90   | 127.68  |
| 14 | 1 | 2012_051 | 1.0  | 1 | 49.01   | 56.35   |
| 14 | 1 | 2012_051 | 1.0  | 2 | 27.61   | 29.32   |
| 14 | 1 | 2012_051 | 5.0  | 1 | 23.63   | 11.88   |
| 14 | 1 | 2012_051 | 5.0  | 2 | 24.26   | 8.14    |
| 14 | 1 | 2012_051 | 10.0 | 1 | 0.00    | 0.00    |
| 14 | 1 | 2012_051 | 10.0 | 2 | 0.00    | 0.00    |
| 14 | 1 | 2012_051 | A    | 1 | 885.45  | 2721.94 |
| 14 | 1 | 2012_051 | A    | 2 | 500.09  | 1578.44 |
| 14 | 1 | 2012_086 | 0.0  | 1 | 909.87  | 3038.58 |
| 14 | 1 | 2012_086 | 0.0  | 2 | 915.29  | 2795.48 |
| 14 | 1 | 2012_086 | 0.1  | 1 | 106.35  | 164.90  |
| 14 | 1 | 2012_086 | 0.1  | 2 | 104.93  | 124.29  |
| 14 | 1 | 2012_086 | 1.0  | 1 | 39.98   | 34.00   |
| 14 | 1 | 2012_086 | 1.0  | 2 | 29.15   | 22.99   |
| 14 | 1 | 2012_086 | 5.0  | 1 | 0.00    | 0.00    |
| 14 | 1 | 2012_086 | 5.0  | 2 | 0.00    | 0.00    |
| 14 | 1 | 2012_086 | 10.0 | 1 | 0.00    | 0.00    |
| 14 | 1 | 2012_086 | 10.0 | 2 | 0.00    | 0.00    |
| 14 | 1 | 2012_086 | A    | 1 | 883.69  | 2947.43 |
| 14 | 1 | 2012_086 | A    | 2 | 842.90  | 2948.39 |
| 14 | 1 | 2012_117 | 0.0  | 1 | 1229.51 | 4042.15 |
| 14 | 1 | 2012_117 | 0.0  | 2 | 1490.98 | 4735.58 |
| 14 | 1 | 2012_117 | 0.1  | 1 | 104.86  | 162.86  |
| 14 | 1 | 2012_117 | 0.1  | 2 | 110.84  | 151.53  |
| 14 | 1 | 2012_117 | 1.0  | 1 | 47.03   | 57.15   |
| 14 | 1 | 2012_117 | 1.0  | 2 | 59.02   | 68.96   |
| 14 | 1 | 2012_117 | 5.0  | 1 | 35.53   | 27.06   |
| 14 | 1 | 2012_117 | 5.0  | 2 | 21.58   | 16.33   |

|    |   |          |      |   |         |         |
|----|---|----------|------|---|---------|---------|
| 14 | 1 | 2012_117 | 10.0 | 1 | 0.00    | 0.00    |
| 14 | 1 | 2012_117 | 10.0 | 2 | 2.08    | 1.67    |
| 14 | 1 | 2012_117 | A    | 1 | 1017.57 | 3130.12 |
| 14 | 1 | 2012_117 | A    | 2 | 1019.20 | 3179.90 |
| 14 | 1 | 2012_125 | 0.0  | 1 | 874.84  | 2623.89 |
| 14 | 1 | 2012_125 | 0.0  | 2 | 864.69  | 2843.48 |
| 14 | 1 | 2012_125 | 0.1  | 1 | 98.71   | 127.68  |
| 14 | 1 | 2012_125 | 0.1  | 2 | 105.50  | 161.73  |
| 14 | 1 | 2012_125 | 1.0  | 1 | 42.87   | 36.32   |
| 14 | 1 | 2012_125 | 1.0  | 2 | 59.29   | 62.91   |
| 14 | 1 | 2012_125 | 5.0  | 1 | 0.00    | 0.00    |
| 14 | 1 | 2012_125 | 5.0  | 2 | 10.93   | 5.23    |
| 14 | 1 | 2012_125 | 10.0 | 1 | 0.00    | 0.00    |
| 14 | 1 | 2012_125 | 10.0 | 2 | 0.00    | 0.00    |
| 14 | 1 | 2012_125 | A    | 1 | 798.73  | 2647.55 |
| 14 | 1 | 2012_125 | A    | 2 | 948.44  | 3021.99 |
| 14 | 1 | 2012_135 | 0.0  | 1 | 453.52  | 1326.06 |
| 14 | 1 | 2012_135 | 0.0  | 2 | 462.42  | 1037.76 |
| 14 | 1 | 2012_135 | 0.1  | 1 | 83.01   | 95.38   |
| 14 | 1 | 2012_135 | 0.1  | 2 | 78.86   | 109.73  |
| 14 | 1 | 2012_135 | 1.0  | 1 | 60.14   | 67.20   |
| 14 | 1 | 2012_135 | 1.0  | 2 | 37.59   | 51.02   |
| 14 | 1 | 2012_135 | 5.0  | 1 | 11.53   | 5.03    |
| 14 | 1 | 2012_135 | 5.0  | 2 | 0.00    | 0.00    |
| 14 | 1 | 2012_135 | 10.0 | 1 | 0.00    | 0.00    |
| 14 | 1 | 2012_135 | 10.0 | 2 | 0.00    | 0.00    |
| 14 | 1 | 2012_135 | A    | 1 | 457.75  | 980.90  |
| 14 | 1 | 2012_135 | A    | 2 | 448.81  | 1074.63 |
| 14 | 1 | 2013_01  | 0.0  | 1 | 809.90  | 2408.77 |
| 14 | 1 | 2013_01  | 0.0  | 2 | 1056.18 | 3349.01 |
| 14 | 1 | 2013_01  | 0.1  | 1 | 74.72   | 94.86   |
| 14 | 1 | 2013_01  | 0.1  | 2 | 85.26   | 126.08  |
| 14 | 1 | 2013_01  | 1.0  | 1 | 43.99   | 39.93   |
| 14 | 1 | 2013_01  | 1.0  | 2 | 48.76   | 38.93   |
| 14 | 1 | 2013_01  | 5.0  | 1 | 0.00    | 0.00    |
| 14 | 1 | 2013_01  | 5.0  | 2 | 0.00    | 0.00    |
| 14 | 1 | 2013_01  | 10.0 | 1 | 0.00    | 0.00    |
| 14 | 1 | 2013_01  | 10.0 | 2 | 0.72    | 0.02    |
| 14 | 1 | 2013_01  | A    | 1 | 1405.80 | 4474.59 |
| 14 | 1 | 2013_01  | A    | 2 | 759.82  | 2460.37 |
| 14 | 1 | 2013_03  | 0.0  | 1 | 1148.35 | 3923.58 |

|    |   |         |      |   |         |         |
|----|---|---------|------|---|---------|---------|
| 14 | 1 | 2013_03 | 0.0  | 2 | 1011.27 | 2948.39 |
| 14 | 1 | 2013_03 | 0.1  | 1 | 80.27   | 100.64  |
| 14 | 1 | 2013_03 | 0.1  | 2 | 84.91   | 105.32  |
| 14 | 1 | 2013_03 | 1.0  | 1 | 65.53   | 62.63   |
| 14 | 1 | 2013_03 | 1.0  | 2 | 48.70   | 36.21   |
| 14 | 1 | 2013_03 | 5.0  | 1 | 9.11    | 4.91    |
| 14 | 1 | 2013_03 | 5.0  | 2 | 7.26    | 1.67    |
| 14 | 1 | 2013_03 | 10.0 | 1 | 0.00    | 0.00    |
| 14 | 1 | 2013_03 | 10.0 | 2 | 0.45    | 0.01    |
| 14 | 1 | 2013_03 | A    | 1 | 1093.26 | 3203.94 |
| 14 | 1 | 2013_03 | A    | 2 | 912.27  | 2764.64 |
| 14 | 1 | 2013_04 | 0.0  | 1 | 1008.04 | 3409.80 |
| 14 | 1 | 2013_04 | 0.0  | 2 | 915.21  | 2765.57 |
| 14 | 1 | 2013_04 | 0.1  | 1 | 99.79   | 133.76  |
| 14 | 1 | 2013_04 | 0.1  | 2 | 152.91  | 136.23  |
| 14 | 1 | 2013_04 | 1.0  | 1 | 54.01   | 57.95   |
| 14 | 1 | 2013_04 | 1.0  | 2 | 96.19   | 63.76   |
| 14 | 1 | 2013_04 | 5.0  | 2 | 39.77   | 25.88   |
| 14 | 1 | 2013_04 | 5.0  | 2 | 68.94   | 24.28   |
| 14 | 1 | 2013_04 | 10.0 | 1 | 0.00    | 0.00    |
| 14 | 1 | 2013_04 | 10.0 | 2 | 16.81   | 3.70    |
| 14 | 1 | 2013_04 | A    | 1 | 659.46  | 1820.88 |
| 14 | 1 | 2013_04 | A    | 2 | 1192.42 | 3568.93 |
| 14 | 1 | 2013_11 | 0.0  | 1 | 978.58  | 3288.76 |
| 14 | 1 | 2013_11 | 0.0  | 2 | 1159.85 | 4189.97 |
| 14 | 1 | 2013_11 | 0.1  | 1 | 96.27   | 104.59  |
| 14 | 1 | 2013_11 | 0.1  | 2 | 102.18  | 117.09  |
| 14 | 1 | 2013_11 | 1.0  | 1 | 61.00   | 52.55   |
| 14 | 1 | 2013_11 | 1.0  | 2 | 59.21   | 62.63   |
| 14 | 1 | 2013_11 | 5.0  | 1 | 0.00    | 0.00    |
| 14 | 1 | 2013_11 | 5.0  | 2 | 0.00    | 0.00    |
| 14 | 1 | 2013_11 | 10.0 | 1 | 0.00    | 0.00    |
| 14 | 1 | 2013_11 | 10.0 | 2 | 0.00    | 0.00    |
| 14 | 1 | 2013_11 | A    | 1 | 1085.26 | 3849.55 |
| 14 | 1 | 2013_11 | A    | 2 | 1245.13 | 3401.52 |
| 14 | 1 | 2013_18 | 0.0  | 1 | 543.59  | 1696.04 |
| 14 | 1 | 2013_18 | 0.0  | 2 | 1101.98 | 3550.96 |
| 14 | 1 | 2013_18 | 0.1  | 1 | 91.23   | 115.56  |
| 14 | 1 | 2013_18 | 0.1  | 2 | 91.35   | 127.88  |
| 14 | 1 | 2013_18 | 1.0  | 1 | 53.40   | 50.27   |
| 14 | 1 | 2013_18 | 1.0  | 2 | 59.40   | 57.41   |

|    |   |         |      |   |         |         |
|----|---|---------|------|---|---------|---------|
| 14 | 1 | 2013_18 | 5.0  | 1 | 1.92    | 0.10    |
| 14 | 1 | 2013_18 | 5.0  | 2 | 3.53    | 0.21    |
| 14 | 1 | 2013_18 | 10.0 | 1 | 0.00    | 0.00    |
| 14 | 1 | 2013_18 | 10.0 | 2 | 0.00    | 0.00    |
| 14 | 1 | 2013_18 | A    | 1 | 853.09  | 2285.98 |
| 14 | 1 | 2013_18 | A    | 2 | 1002.10 | 2981.21 |
| 14 | 1 | 2013_20 | 0.0  | 1 | 1065.79 | 3225.04 |
| 14 | 1 | 2013_20 | 0.0  | 2 | 1211.58 | 3780.58 |
| 14 | 1 | 2013_20 | 0.1  | 1 | 101.63  | 139.98  |
| 14 | 1 | 2013_20 | 0.1  | 2 | 91.16   | 114.80  |
| 14 | 1 | 2013_20 | 1.0  | 1 | 59.87   | 56.88   |
| 14 | 1 | 2013_20 | 1.0  | 2 | 63.62   | 63.90   |
| 14 | 1 | 2013_20 | 5.0  | 1 | 0.00    | 0.00    |
| 14 | 1 | 2013_20 | 5.0  | 2 | 0.00    | 0.00    |
| 14 | 1 | 2013_20 | 10.0 | 1 | 0.00    | 0.00    |
| 14 | 1 | 2013_20 | 10.0 | 2 | 0.00    | 0.00    |
| 14 | 1 | 2013_20 | A    | 1 | 1166.24 | 4097.56 |
| 14 | 1 | 2013_20 | A    | 2 | 1284.08 | 4267.20 |
| 14 | 2 | 2010_01 | 0.0  | 1 | 575.65  | 1511.56 |
| 14 | 2 | 2010_01 | 0.0  | 2 | 831.03  | 2617.54 |
| 14 | 2 | 2010_01 | 0.1  | 1 | 78.62   | 99.23   |
| 14 | 2 | 2010_01 | 0.1  | 2 | 81.27   | 127.68  |
| 14 | 2 | 2010_01 | 1.0  | 1 | 49.50   | 51.40   |
| 14 | 2 | 2010_01 | 1.0  | 2 | 27.73   | 32.67   |
| 14 | 2 | 2010_01 | 5.0  | 1 | 0.00    | 0.00    |
| 14 | 2 | 2010_01 | 5.0  | 2 | 0.00    | 0.00    |
| 14 | 2 | 2010_01 | 10.0 | 1 | 0.00    | 0.00    |
| 14 | 2 | 2010_01 | 10.0 | 2 | 0.00    | 0.00    |
| 14 | 2 | 2010_01 | A    | 1 | 739.60  | 2050.84 |
| 14 | 2 | 2010_01 | A    | 2 | 786.30  | 2740.46 |
| 14 | 2 | 2010_03 | 0.0  | 1 | 1837.62 | 6136.15 |
| 14 | 2 | 2010_03 | 0.0  | 2 | 1200.17 | 3856.15 |
| 14 | 2 | 2010_03 | 0.1  | 1 | 143.06  | 222.20  |
| 14 | 2 | 2010_03 | 0.1  | 2 | 166.95  | 267.64  |
| 14 | 2 | 2010_03 | 1.0  | 1 | 0.00    | 0.00    |
| 14 | 2 | 2010_03 | 1.0  | 2 | 0.97    | 1.06    |
| 14 | 2 | 2010_03 | 5.0  | 1 | 0.00    | 0.00    |
| 14 | 2 | 2010_03 | 5.0  | 2 | 0.00    | 0.00    |
| 14 | 2 | 2010_03 | 10.0 | 1 | 0.00    | 0.00    |
| 14 | 2 | 2010_03 | 10.0 | 2 | 0.00    | 0.00    |
| 14 | 2 | 2010_03 | A    | 1 | 1006.17 | 2863.36 |

|    |   |         |      |   |         |         |
|----|---|---------|------|---|---------|---------|
| 14 | 2 | 2010_03 | A    | 2 | 1953.96 | 7777.20 |
| 14 | 2 | 2010_04 | 0.0  | 1 | .       | .       |
| 14 | 2 | 2010_04 | 0.0  | 2 | 305.36  | 843.93  |
| 14 | 2 | 2010_04 | 0.1  | 1 | 50.06   | 88.41   |
| 14 | 2 | 2010_04 | 0.1  | 2 | 60.91   | 81.55   |
| 14 | 2 | 2010_04 | 1.0  | 1 | 23.29   | 23.59   |
| 14 | 2 | 2010_04 | 1.0  | 2 | 15.00   | 15.76   |
| 14 | 2 | 2010_04 | 5.0  | 1 | 0.00    | 0.00    |
| 14 | 2 | 2010_04 | 5.0  | 2 | 0.00    | 0.00    |
| 14 | 2 | 2010_04 | 10.0 | 1 | .       | .       |
| 14 | 2 | 2010_04 | 10.0 | 2 | 0.00    | 0.00    |
| 14 | 2 | 2010_04 | A    | 1 | 542.66  | 1420.63 |
| 14 | 2 | 2010_04 | A    | 2 | .       | .       |
| 14 | 2 | 2010_06 | 0.0  | 1 | 567.70  | 1551.79 |
| 14 | 2 | 2010_06 | 0.0  | 2 | 488.14  | 1299.73 |
| 14 | 2 | 2010_06 | 0.1  | 1 | 91.81   | 131.10  |
| 14 | 2 | 2010_06 | 0.1  | 2 | 101.19  | 139.77  |
| 14 | 2 | 2010_06 | 1.0  | 1 | 53.53   | 52.94   |
| 14 | 2 | 2010_06 | 1.0  | 2 | 49.29   | 45.13   |
| 14 | 2 | 2010_06 | 5.0  | 1 | 0.40    | 0.00    |
| 14 | 2 | 2010_06 | 5.0  | 2 | 0.00    | 0.00    |
| 14 | 2 | 2010_06 | 10.0 | 1 | 1.04    | 0.13    |
| 14 | 2 | 2010_06 | 10.0 | 2 | 0.00    | 0.00    |
| 14 | 2 | 2010_06 | A    | 1 | 746.76  | 1976.87 |
| 14 | 2 | 2010_06 | A    | 2 | 655.63  | 1814.84 |
| 14 | 2 | 2010_08 | 0.0  | 1 | 759.03  | 2222.03 |
| 14 | 2 | 2010_08 | 0.0  | 2 | 577.04  | 1665.52 |
| 14 | 2 | 2010_08 | 0.1  | 1 | 87.23   | 121.74  |
| 14 | 2 | 2010_08 | 0.1  | 2 | 71.14   | 105.32  |
| 14 | 2 | 2010_08 | 1.0  | 1 | 17.25   | 5.77    |
| 14 | 2 | 2010_08 | 1.0  | 2 | 34.09   | 31.37   |
| 14 | 2 | 2010_08 | 5.0  | 1 | 0.00    | 0.00    |
| 14 | 2 | 2010_08 | 5.0  | 2 | 0.00    | 0.00    |
| 14 | 2 | 2010_08 | 10.0 | 1 | 0.00    | 0.00    |
| 14 | 2 | 2010_08 | 10.0 | 2 | 0.00    | 0.00    |
| 14 | 2 | 2010_08 | A    | 1 | 809.49  | 2460.37 |
| 14 | 2 | 2010_08 | A    | 2 | 893.25  | 2537.45 |
| 14 | 2 | 2010_10 | 0.0  | 1 | 501.67  | 1326.06 |
| 14 | 2 | 2010_10 | 0.0  | 2 | 863.27  | 2887.12 |
| 14 | 2 | 2010_10 | 0.1  | 1 | 80.66   | 109.73  |
| 14 | 2 | 2010_10 | 0.1  | 2 | 72.92   | 86.26   |

|    |   |         |      |   |         |         |
|----|---|---------|------|---|---------|---------|
| 14 | 2 | 2010_10 | 1.0  | 1 | 27.21   | 25.52   |
| 14 | 2 | 2010_10 | 1.0  | 2 | 42.57   | 34.00   |
| 14 | 2 | 2010_10 | 5.0  | 1 | 1.42    | 0.69    |
| 14 | 2 | 2010_10 | 5.0  | 2 | 0.58    | 0.02    |
| 14 | 2 | 2010_10 | 10.0 | 1 | 0.00    | 0.00    |
| 14 | 2 | 2010_10 | 10.0 | 2 | 0.65    | 0.00    |
| 14 | 2 | 2010_10 | A    | 1 | 738.38  | 2427.08 |
| 14 | 2 | 2010_10 | A    | 2 | 476.90  | 1313.18 |
| 14 | 2 | 2011_02 | 0.0  | 1 | 989.56  | 3101.43 |
| 14 | 2 | 2011_02 | 0.0  | 2 | 1168.68 | 4128.25 |
| 14 | 2 | 2011_02 | 0.1  | 1 | 108.13  | 164.67  |
| 14 | 2 | 2011_02 | 0.1  | 2 | 95.52   | 156.37  |
| 14 | 2 | 2011_02 | 1.0  | 1 | 44.96   | 29.03   |
| 14 | 2 | 2011_02 | 1.0  | 2 | 37.55   | 36.10   |
| 14 | 2 | 2011_02 | 5.0  | 1 | 1.00    | 0.02    |
| 14 | 2 | 2011_02 | 5.0  | 2 | 2.48    | 0.00    |
| 14 | 2 | 2011_02 | 10.0 | 1 | 1.49    | 0.02    |
| 14 | 2 | 2011_02 | 10.0 | 2 | 0.53    | 0.03    |
| 14 | 2 | 2011_02 | A    | 1 | 1399.23 | 4214.10 |
| 14 | 2 | 2011_02 | A    | 2 | 1213.49 | 4171.64 |
| 14 | 2 | 2011_15 | 0.0  | 1 | 802.64  | 2207.02 |
| 14 | 2 | 2011_15 | 0.0  | 2 | 866.05  | 2965.74 |
| 14 | 2 | 2011_15 | 0.1  | 1 | 77.92   | 90.76   |
| 14 | 2 | 2011_15 | 0.1  | 2 | 77.41   | 91.61   |
| 14 | 2 | 2011_15 | 1.0  | 1 | 16.69   | 17.95   |
| 14 | 2 | 2011_15 | 1.0  | 2 | 27.89   | 19.87   |
| 14 | 2 | 2011_15 | 5.0  | 1 | 0.00    | 0.00    |
| 14 | 2 | 2011_15 | 5.0  | 2 | 0.00    | 0.00    |
| 14 | 2 | 2011_15 | 10.0 | 1 | 0.29    | 0.17    |
| 14 | 2 | 2011_15 | 10.0 | 2 | 0.00    | 0.00    |
| 14 | 2 | 2011_15 | A    | 1 | 934.93  | 3027.84 |
| 14 | 2 | 2011_15 | A    | 2 | 580.93  | 1636.71 |
| 14 | 2 | 2011_63 | 0.0  | 1 | 735.92  | 1910.45 |
| 14 | 2 | 2011_63 | 0.0  | 2 | 704.43  | 2165.58 |
| 14 | 2 | 2011_63 | 0.1  | 1 | 111.64  | 200.81  |
| 14 | 2 | 2011_63 | 0.1  | 2 | 115.06  | 214.60  |
| 14 | 2 | 2011_63 | 1.0  | 1 | 66.90   | 72.23   |
| 14 | 2 | 2011_63 | 1.0  | 2 | 74.85   | 122.13  |
| 14 | 2 | 2011_63 | 5.0  | 1 | 14.34   | 17.06   |
| 14 | 2 | 2011_63 | 5.0  | 2 | 0.00    | 0.00    |
| 14 | 2 | 2011_63 | 10.0 | 1 | 0.00    | 0.00    |

|    |   |          |      |   |         |         |
|----|---|----------|------|---|---------|---------|
| 14 | 2 | 2011_63  | 10.0 | 2 | 0.00    | 0.00    |
| 14 | 2 | 2011_63  | A    | 1 | 758.71  | 2217.02 |
| 14 | 2 | 2011_63  | A    | 2 | 814.45  | 2534.78 |
| 14 | 2 | 2011_67  | 0.0  | 1 | 655.20  | 1905.03 |
| 14 | 2 | 2011_67  | 0.0  | 2 | 765.92  | 2424.46 |
| 14 | 2 | 2011_67  | 0.1  | 1 | 95.14   | 177.19  |
| 14 | 2 | 2011_67  | 0.1  | 2 | 93.31   | 148.92  |
| 14 | 2 | 2011_67  | 1.0  | 1 | 61.03   | 78.07   |
| 14 | 2 | 2011_67  | 1.0  | 2 | 55.49   | 60.68   |
| 14 | 2 | 2011_67  | 5.0  | 1 | 0.00    | 0.00    |
| 14 | 2 | 2011_67  | 5.0  | 2 | 0.00    | 0.00    |
| 14 | 2 | 2011_67  | 10.0 | 1 | 0.00    | 0.00    |
| 14 | 2 | 2011_67  | 10.0 | 2 | 0.00    | 0.00    |
| 14 | 2 | 2011_67  | A    | 1 | 558.48  | 1618.12 |
| 14 | 2 | 2011_67  | A    | 2 | 966.71  | 3064.04 |
| 14 | 2 | 2011_88  | 0.0  | 1 | 1492.56 | 4827.50 |
| 14 | 2 | 2011_88  | 0.0  | 2 | 1470.23 | 4905.39 |
| 14 | 2 | 2011_88  | 0.1  | 1 | 52.62   | 46.20   |
| 14 | 2 | 2011_88  | 0.1  | 2 | 47.74   | 49.27   |
| 14 | 2 | 2011_88  | 1.0  | 1 | 14.70   | 16.62   |
| 14 | 2 | 2011_88  | 1.0  | 2 | 26.38   | 21.81   |
| 14 | 2 | 2011_88  | 5.0  | 1 | 0.00    | 0.00    |
| 14 | 2 | 2011_88  | 5.0  | 2 | 0.00    | 0.00    |
| 14 | 2 | 2011_88  | 10.0 | 1 | 0.00    | 0.00    |
| 14 | 2 | 2011_88  | 10.0 | 2 | 0.00    | 0.00    |
| 14 | 2 | 2011_88  | A    | 1 | 1145.24 | 3445.08 |
| 14 | 2 | 2011_88  | A    | 2 | 1455.19 | 4419.04 |
| 14 | 2 | 2012_051 | 0.0  | 1 | 693.12  | 2252.21 |
| 14 | 2 | 2012_051 | 0.0  | 2 | 664.41  | 2424.46 |
| 14 | 2 | 2012_051 | 0.1  | 1 | 93.20   | 116.52  |
| 14 | 2 | 2012_051 | 0.1  | 2 | 80.83   | 107.88  |
| 14 | 2 | 2012_051 | 1.0  | 1 | 34.65   | 25.07   |
| 14 | 2 | 2012_051 | 1.0  | 2 | 35.24   | 26.60   |
| 14 | 2 | 2012_051 | 5.0  | 1 | 1.03    | 0.10    |
| 14 | 2 | 2012_051 | 5.0  | 2 | 0.54    | 0.03    |
| 14 | 2 | 2012_051 | 10.0 | 1 | 1.28    | 0.00    |
| 14 | 2 | 2012_051 | 10.0 | 2 | 0.00    | 0.00    |
| 14 | 2 | 2012_051 | A    | 1 | 948.55  | 2625.71 |
| 14 | 2 | 2012_051 | A    | 2 | 857.50  | 2315.74 |
| 14 | 2 | 2012_086 | 0.0  | 1 | 860.66  | 2434.94 |
| 14 | 2 | 2012_086 | 0.0  | 2 | .       | .       |

|    |   |          |      |   |         |         |
|----|---|----------|------|---|---------|---------|
| 14 | 2 | 2012_086 | 0.1  | 1 | 61.91   | 82.03   |
| 14 | 2 | 2012_086 | 0.1  | 2 | 81.42   | 101.00  |
| 14 | 2 | 2012_086 | 1.0  | 1 | 25.33   | 16.62   |
| 14 | 2 | 2012_086 | 1.0  | 2 | .       | .       |
| 14 | 2 | 2012_086 | 5.0  | 1 | 0.00    | 0.00    |
| 14 | 2 | 2012_086 | 5.0  | 2 | .       | .       |
| 14 | 2 | 2012_086 | 10.0 | 1 | 1.26    | 0.09    |
| 14 | 2 | 2012_086 | 10.0 | 2 | .       | .       |
| 14 | 2 | 2012_086 | A    | 1 | 864.90  | 2740.46 |
| 14 | 2 | 2012_086 | A    | 2 | .       | .       |
| 14 | 2 | 2012_117 | 0.0  | 1 | 1232.41 | 4403.74 |
| 14 | 2 | 2012_117 | 0.0  | 2 | 673.87  | 2046.03 |
| 14 | 2 | 2012_117 | 0.1  | 1 | 64.12   | 77.29   |
| 14 | 2 | 2012_117 | 0.1  | 2 | 54.59   | 73.44   |
| 14 | 2 | 2012_117 | 1.0  | 1 | 17.16   | 10.24   |
| 14 | 2 | 2012_117 | 1.0  | 2 | 33.17   | 29.42   |
| 14 | 2 | 2012_117 | 5.0  | 1 | 0.00    | 0.00    |
| 14 | 2 | 2012_117 | 5.0  | 2 | 3.30    | 3.24    |
| 14 | 2 | 2012_117 | 10.0 | 1 | 0.00    | 0.00    |
| 14 | 2 | 2012_117 | 10.0 | 2 | 0.00    | 0.00    |
| 14 | 2 | 2012_117 | A    | 1 | 1032.72 | 3483.68 |
| 14 | 2 | 2012_117 | A    | 2 | 985.06  | 3200.93 |
| 14 | 2 | 2012_125 | 0.0  | 1 | 539.85  | 1530.22 |
| 14 | 2 | 2012_125 | 0.0  | 2 | 351.39  | 961.01  |
| 14 | 2 | 2012_125 | 0.1  | 1 | 83.43   | 103.33  |
| 14 | 2 | 2012_125 | 0.1  | 2 | 84.28   | 112.53  |
| 14 | 2 | 2012_125 | 1.0  | 1 | 52.07   | 55.68   |
| 14 | 2 | 2012_125 | 1.0  | 2 | 49.16   | 55.68   |
| 14 | 2 | 2012_125 | 5.0  | 1 | 1.92    | 0.02    |
| 14 | 2 | 2012_125 | 5.0  | 2 | 0.54    | 0.07    |
| 14 | 2 | 2012_125 | 10.0 | 1 | 2.97    | 0.17    |
| 14 | 2 | 2012_125 | 10.0 | 2 | 0.00    | 0.00    |
| 14 | 2 | 2012_125 | A    | 1 | 355.11  | 821.94  |
| 14 | 2 | 2012_125 | A    | 2 | 631.86  | 1969.78 |
| 14 | 2 | 2012_135 | 0.0  | 1 | 491.97  | 1254.13 |
| 14 | 2 | 2012_135 | 0.0  | 2 | .       | .       |
| 14 | 2 | 2012_135 | 0.1  | 1 | 65.89   | 91.61   |
| 14 | 2 | 2012_135 | 0.1  | 2 | 56.54   | 72.84   |
| 14 | 2 | 2012_135 | 1.0  | 1 | 19.30   | 13.79   |
| 14 | 2 | 2012_135 | 1.0  | 2 | .       | .       |
| 14 | 2 | 2012_135 | 5.0  | 1 | 16.15   | 9.73    |



|    |   |          |      |   |         |         |
|----|---|----------|------|---|---------|---------|
| 14 | 2 | 2012_135 | 5.0  | 2 | .       | .       |
| 14 | 2 | 2012_135 | 10.0 | 1 | 3.99    | 4.79    |
| 14 | 2 | 2012_135 | 10.0 | 2 | .       | .       |
| 14 | 2 | 2012_135 | A    | 1 | 499.23  | 1452.88 |
| 14 | 2 | 2012_135 | A    | 2 | .       | .       |
| 14 | 2 | 2013_01  | 0.0  | 1 | 931.70  | 2568.80 |
| 14 | 2 | 2013_01  | 0.0  | 2 | 945.23  | 2764.64 |
| 14 | 2 | 2013_01  | 0.1  | 1 | 53.87   | 82.68   |
| 14 | 2 | 2013_01  | 0.1  | 2 | 114.69  | 171.57  |
| 14 | 2 | 2013_01  | 1.0  | 1 | 29.30   | 30.58   |
| 14 | 2 | 2013_01  | 1.0  | 2 | 27.52   | 17.95   |
| 14 | 2 | 2013_01  | 5.0  | 1 | 0.00    | 0.00    |
| 14 | 2 | 2013_01  | 5.0  | 2 | 0.00    | 0.00    |
| 14 | 2 | 2013_01  | 10.0 | 1 | 0.29    | 0.09    |
| 14 | 2 | 2013_01  | 10.0 | 2 | 0.00    | 0.00    |
| 14 | 2 | 2013_01  | A    | 1 | 682.32  | 1936.88 |
| 14 | 2 | 2013_01  | A    | 2 | 705.22  | 2056.46 |
| 14 | 2 | 2013_03  | 0.0  | 1 | 1172.79 | 4214.10 |
| 14 | 2 | 2013_03  | 0.0  | 2 | .       | .       |
| 14 | 2 | 2013_03  | 0.1  | 1 | 56.04   | 69.69   |
| 14 | 2 | 2013_03  | 0.1  | 2 | 69.79   | 85.28   |
| 14 | 2 | 2013_03  | 1.0  | 1 | 63.38   | 81.23   |
| 14 | 2 | 2013_03  | 1.0  | 2 | 30.78   | 28.18   |
| 14 | 2 | 2013_03  | 5.0  | 1 | 11.33   | 4.05    |
| 14 | 2 | 2013_03  | 5.0  | 2 | 9.00    | 5.68    |
| 14 | 2 | 2013_03  | 10.0 | 1 | 0.00    | 0.00    |
| 14 | 2 | 2013_03  | 10.0 | 2 | .       | .       |
| 14 | 2 | 2013_03  | A    | 1 | 966.22  | 3802.41 |
| 14 | 2 | 2013_03  | A    | 2 | .       | .       |
| 14 | 2 | 2013_04  | 0.0  | 1 | 1383.10 | 4665.10 |
| 14 | 2 | 2013_04  | 0.0  | 2 | 1187.01 | 4204.90 |
| 14 | 2 | 2013_04  | 0.1  | 1 | 107.02  | 194.83  |
| 14 | 2 | 2013_04  | 0.1  | 2 | 85.66   | 118.24  |
| 14 | 2 | 2013_04  | 1.0  | 1 | 53.32   | 75.28   |
| 14 | 2 | 2013_04  | 1.0  | 2 | 52.04   | 60.13   |
| 14 | 2 | 2013_04  | 5.0  | 1 | 0.00    | 0.00    |
| 14 | 2 | 2013_04  | 5.0  | 2 | 0.00    | 0.00    |
| 14 | 2 | 2013_04  | 10.0 | 1 | 0.00    | 0.00    |
| 14 | 2 | 2013_04  | 10.0 | 2 | 0.00    | 0.00    |
| 14 | 2 | 2013_04  | A    | 1 | 910.55  | 2845.37 |
| 14 | 2 | 2013_04  | A    | 2 | 926.05  | 2908.11 |

|    |   |         |      |   |         |         |
|----|---|---------|------|---|---------|---------|
| 14 | 2 | 2013_11 | 0.0  | 1 | 685.90  | 2380.15 |
| 14 | 2 | 2013_11 | 0.0  | 2 | 746.34  | 2671.31 |
| 14 | 2 | 2013_11 | 0.1  | 1 | 79.77   | 100.47  |
| 14 | 2 | 2013_11 | 0.1  | 2 | 87.51   | 133.96  |
| 14 | 2 | 2013_11 | 1.0  | 1 | 49.86   | 50.27   |
| 14 | 2 | 2013_11 | 1.0  | 2 | 59.38   | 73.44   |
| 14 | 2 | 2013_11 | 5.0  | 1 | 0.04    | 0.02    |
| 14 | 2 | 2013_11 | 5.0  | 2 | 0.00    | 0.00    |
| 14 | 2 | 2013_11 | 10.0 | 1 | 0.00    | 0.00    |
| 14 | 2 | 2013_11 | 10.0 | 2 | 0.00    | 0.00    |
| 14 | 2 | 2013_11 | A    | 1 | 482.05  | 1344.84 |
| 14 | 2 | 2013_11 | A    | 2 | 1029.15 | 2870.00 |
| 14 | 2 | 2013_18 | 0.0  | 1 | 962.20  | 2930.14 |
| 14 | 2 | 2013_18 | 0.0  | 2 | 473.69  | 1394.03 |
| 14 | 2 | 2013_18 | 0.1  | 1 | 87.03   | 131.31  |
| 14 | 2 | 2013_18 | 0.1  | 2 | 90.67   | 104.05  |
| 14 | 2 | 2013_18 | 1.0  | 1 | 60.70   | 62.35   |
| 14 | 2 | 2013_18 | 1.0  | 2 | 52.59   | 51.78   |
| 14 | 2 | 2013_18 | 5.0  | 1 | 0.00    | 0.00    |
| 14 | 2 | 2013_18 | 5.0  | 2 | 1.00    | 0.15    |
| 14 | 2 | 2013_18 | 10.0 | 1 | 4.46    | 0.07    |
| 14 | 2 | 2013_18 | 10.0 | 2 | 0.00    | 0.00    |
| 14 | 2 | 2013_18 | A    | 1 | 550.64  | 1530.22 |
| 14 | 2 | 2013_18 | A    | 2 | 712.97  | 2494.78 |
| 14 | 2 | 2013_20 | 0.0  | 1 | 622.42  | 1712.13 |
| 14 | 2 | 2013_20 | 0.0  | 2 | 521.17  | 1526.76 |
| 14 | 2 | 2013_20 | 0.1  | 1 | 102.21  | 147.41  |
| 14 | 2 | 2013_20 | 0.1  | 2 | 97.89   | 145.48  |
| 14 | 2 | 2013_20 | 1.0  | 1 | 29.53   | 21.48   |
| 14 | 2 | 2013_20 | 1.0  | 2 | 46.73   | 35.68   |
| 14 | 2 | 2013_20 | 5.0  | 1 | 0.00    | 0.00    |
| 14 | 2 | 2013_20 | 5.0  | 2 | 0.46    | 0.01    |
| 14 | 2 | 2013_20 | 10.0 | 1 | 0.00    | 0.00    |
| 14 | 2 | 2013_20 | 10.0 | 2 | 1.42    | 0.26    |
| 14 | 2 | 2013_20 | A    | 1 | 845.11  | 2696.11 |
| 14 | 2 | 2013_20 | A    | 2 | 592.62  | 1562.28 |
| 21 | 1 | 2010_01 | 0.0  | 1 | 1451.53 | 5163.18 |
| 21 | 1 | 2010_01 | 0.0  | 2 | 1422.03 | 4357.99 |
| 21 | 1 | 2010_01 | 0.1  | 1 | 182.63  | 335.56  |
| 21 | 1 | 2010_01 | 0.1  | 2 | 178.88  | 295.90  |
| 21 | 1 | 2010_01 | 1.0  | 1 | 103.46  | 180.03  |

|    |   |         |      |   |         |         |
|----|---|---------|------|---|---------|---------|
| 21 | 1 | 2010_01 | 1.0  | 2 | 106.78  | 148.71  |
| 21 | 1 | 2010_01 | 5.0  | 1 | 72.00   | 115.94  |
| 21 | 1 | 2010_01 | 5.0  | 2 | 85.37   | 146.77  |
| 21 | 1 | 2010_01 | 10.0 | 1 | 9.79    | 3.63    |
| 21 | 1 | 2010_01 | 10.0 | 2 | 3.15    | 0.66    |
| 21 | 1 | 2010_01 | A    | 1 | 1791.16 | 6036.59 |
| 21 | 1 | 2010_01 | A    | 2 | 1680.11 | 5243.73 |
| 21 | 1 | 2010_03 | 0.0  | 1 | 1300.10 | 4086.22 |
| 21 | 1 | 2010_03 | 0.0  | 2 | 1407.73 | 4462.75 |
| 21 | 1 | 2010_03 | 0.1  | 1 | 232.52  | 498.76  |
| 21 | 1 | 2010_03 | 0.1  | 2 | 208.23  | 370.86  |
| 21 | 1 | 2010_03 | 1.0  | 1 | 65.11   | 73.90   |
| 21 | 1 | 2010_03 | 1.0  | 2 | 57.10   | 67.06   |
| 21 | 1 | 2010_03 | 5.0  | 1 | 1.66    | 0.55    |
| 21 | 1 | 2010_03 | 5.0  | 2 | 10.91   | 0.00    |
| 21 | 1 | 2010_03 | 10.0 | 1 | 0.00    | 0.00    |
| 21 | 1 | 2010_03 | 10.0 | 2 | 0.00    | 0.00    |
| 21 | 1 | 2010_03 | A    | 1 | 1752.28 | 5943.31 |
| 21 | 1 | 2010_03 | A    | 2 | 2117.75 | 7127.07 |
| 21 | 1 | 2010_04 | 0.0  | 1 | 2115.67 | 6877.90 |
| 21 | 1 | 2010_04 | 0.0  | 2 | 978.69  | 2916.72 |
| 21 | 1 | 2010_04 | 0.1  | 1 | 123.22  | 211.50  |
| 21 | 1 | 2010_04 | 0.1  | 2 | 134.08  | 245.50  |
| 21 | 1 | 2010_04 | 1.0  | 1 | 96.08   | 120.76  |
| 21 | 1 | 2010_04 | 1.0  | 2 | 83.52   | 119.21  |
| 21 | 1 | 2010_04 | 5.0  | 1 | 12.19   | 15.98   |
| 21 | 1 | 2010_04 | 5.0  | 2 | 0.00    | 0.00    |
| 21 | 1 | 2010_04 | 10.0 | 1 | 0.00    | 0.00    |
| 21 | 1 | 2010_04 | 10.0 | 2 | 0.00    | 0.00    |
| 21 | 1 | 2010_04 | A    | 1 | 1104.80 | 3786.03 |
| 21 | 1 | 2010_04 | A    | 2 | 1263.68 | 4783.26 |
| 21 | 1 | 2010_06 | 0.0  | 1 | 1787.58 | 5380.66 |
| 21 | 1 | 2010_06 | 0.0  | 2 | 1420.66 | 4628.85 |
| 21 | 1 | 2010_06 | 0.1  | 1 | 143.91  | 237.51  |
| 21 | 1 | 2010_06 | 0.1  | 2 | 152.87  | 225.91  |
| 21 | 1 | 2010_06 | 1.0  | 1 | 107.45  | 197.81  |
| 21 | 1 | 2010_06 | 1.0  | 2 | 124.69  | 213.82  |
| 21 | 1 | 2010_06 | 5.0  | 1 | 0.00    | 0.00    |
| 21 | 1 | 2010_06 | 5.0  | 2 | 0.00    | 0.00    |
| 21 | 1 | 2010_06 | 10.0 | 1 | 0.00    | 0.00    |
| 21 | 1 | 2010_06 | 10.0 | 2 | 0.00    | 0.00    |

|    |   |         |      |   |         |         |
|----|---|---------|------|---|---------|---------|
| 21 | 1 | 2010_06 | A    | 1 | 890.44  | 2761.84 |
| 21 | 1 | 2010_06 | A    | 2 | 1558.70 | 4797.99 |
| 21 | 1 | 2010_08 | 0.0  | 1 | 1609.28 | 6058.65 |
| 21 | 1 | 2010_08 | 0.0  | 2 | 1736.28 | 5491.74 |
| 21 | 1 | 2010_08 | 0.1  | 1 | 145.47  | 199.81  |
| 21 | 1 | 2010_08 | 0.1  | 2 | 126.30  | 217.21  |
| 21 | 1 | 2010_08 | 1.0  | 1 | 77.83   | 81.71   |
| 21 | 1 | 2010_08 | 1.0  | 2 | 87.93   | 115.94  |
| 21 | 1 | 2010_08 | 5.0  | 1 | 0.00    | 0.00    |
| 21 | 1 | 2010_08 | 5.0  | 2 | 0.00    | 0.00    |
| 21 | 1 | 2010_08 | 10.0 | 1 | 0.00    | 0.00    |
| 21 | 1 | 2010_08 | 10.0 | 2 | 0.00    | 0.00    |
| 21 | 1 | 2010_08 | A    | 1 | 1562.37 | 5380.66 |
| 21 | 1 | 2010_08 | A    | 2 | 912.55  | 2761.84 |
| 21 | 1 | 2010_10 | 0.0  | 1 | 1219.39 | 3717.64 |
| 21 | 1 | 2010_10 | 0.0  | 2 | 1050.79 | 3076.80 |
| 21 | 1 | 2010_10 | 0.1  | 1 | 0.00    | 0.00    |
| 21 | 1 | 2010_10 | 0.1  | 2 | 0.00    | 0.00    |
| 21 | 1 | 2010_10 | 1.0  | 1 | 0.00    | 0.00    |
| 21 | 1 | 2010_10 | 1.0  | 2 | 0.00    | 0.00    |
| 21 | 1 | 2010_10 | 5.0  | 1 | 0.00    | 0.00    |
| 21 | 1 | 2010_10 | 5.0  | 2 | 0.00    | 0.00    |
| 21 | 1 | 2010_10 | 10.0 | 1 | 0.00    | 0.00    |
| 21 | 1 | 2010_10 | 10.0 | 2 | 0.00    | 0.00    |
| 21 | 1 | 2010_10 | A    | 1 | 717.16  | 1802.03 |
| 21 | 1 | 2010_10 | A    | 2 | 1210.77 | 4614.39 |
| 21 | 1 | 2011_02 | 0.0  | 1 | 1999.77 | 7052.45 |
| 21 | 1 | 2011_02 | 0.0  | 2 | 1759.15 | 5850.76 |
| 21 | 1 | 2011_02 | 0.1  | 1 | 146.94  | 238.61  |
| 21 | 1 | 2011_02 | 0.1  | 2 | 170.85  | 348.34  |
| 21 | 1 | 2011_02 | 1.0  | 1 | 69.10   | 106.41  |
| 21 | 1 | 2011_02 | 1.0  | 2 | 45.70   | 48.89   |
| 21 | 1 | 2011_02 | 5.0  | 1 | 43.36   | 36.64   |
| 21 | 1 | 2011_02 | 5.0  | 2 | 6.59    | 3.46    |
| 21 | 1 | 2011_02 | 10.0 | 1 | 0.59    | 0.00    |
| 21 | 1 | 2011_02 | 10.0 | 2 | 1.32    | 0.07    |
| 21 | 1 | 2011_02 | A    | 1 | 1863.40 | 6479.60 |
| 21 | 1 | 2011_02 | A    | 2 | 1963.08 | 7025.68 |
| 21 | 1 | 2011_15 | 0.0  | 1 | 1124.54 | 3330.57 |
| 21 | 1 | 2011_15 | 0.0  | 2 | 1159.10 | 4285.74 |
| 21 | 1 | 2011_15 | 0.1  | 1 | 119.09  | 192.36  |

|    |   |         |      |   |         |          |
|----|---|---------|------|---|---------|----------|
| 21 | 1 | 2011_15 | 0.1  | 2 | 141.66  | 238.61   |
| 21 | 1 | 2011_15 | 1.0  | 1 | 79.15   | 89.42    |
| 21 | 1 | 2011_15 | 1.0  | 2 | 81.55   | 106.41   |
| 21 | 1 | 2011_15 | 5.0  | 1 | 11.36   | 6.42     |
| 21 | 1 | 2011_15 | 5.0  | 2 | 54.80   | 54.76    |
| 21 | 1 | 2011_15 | 10.0 | 1 | 0.00    | 0.00     |
| 21 | 1 | 2011_15 | 10.0 | 2 | 0.00    | 0.00     |
| 21 | 1 | 2011_15 | A    | 1 | 2061.86 | 6876.43  |
| 21 | 1 | 2011_15 | A    | 2 | 1328.59 | 4299.68  |
| 21 | 1 | 2011_63 | 0.0  | 1 | 1825.38 | 6317.98  |
| 21 | 1 | 2011_63 | 0.0  | 2 | 1813.95 | 6789.99  |
| 21 | 1 | 2011_63 | 0.1  | 1 | 226.07  | 475.29   |
| 21 | 1 | 2011_63 | 0.1  | 2 | 240.33  | 472.21   |
| 21 | 1 | 2011_63 | 1.0  | 1 | 120.59  | 207.39   |
| 21 | 1 | 2011_63 | 1.0  | 2 | 122.32  | 226.98   |
| 21 | 1 | 2011_63 | 5.0  | 1 | 58.40   | 68.96    |
| 21 | 1 | 2011_63 | 5.0  | 2 | 61.16   | 92.97    |
| 21 | 1 | 2011_63 | 10.0 | 1 | 0.00    | 0.00     |
| 21 | 1 | 2011_63 | 10.0 | 2 | 0.00    | 0.00     |
| 21 | 1 | 2011_63 | A    | 1 | 1796.34 | 6443.98  |
| 21 | 1 | 2011_63 | A    | 2 | 1751.89 | 5966.56  |
| 21 | 1 | 2011_67 | 0.0  | 1 | 2299.41 | 8390.64  |
| 21 | 1 | 2011_67 | 0.0  | 2 | 1702.63 | 5783.17  |
| 21 | 1 | 2011_67 | 0.1  | 1 | 169.14  | 299.57   |
| 21 | 1 | 2011_67 | 0.1  | 2 | 148.41  | 213.82   |
| 21 | 1 | 2011_67 | 1.0  | 1 | 103.00  | 135.19   |
| 21 | 1 | 2011_67 | 1.0  | 2 | 84.30   | 98.17    |
| 21 | 1 | 2011_67 | 5.0  | 1 | 0.00    | 0.00     |
| 21 | 1 | 2011_67 | 5.0  | 2 | 0.00    | 0.00     |
| 21 | 1 | 2011_67 | 10.0 | 1 | 0.00    | 0.00     |
| 21 | 1 | 2011_67 | 10.0 | 2 | 0.00    | 0.00     |
| 21 | 1 | 2011_67 | A    | 1 | 1984.51 | 7904.33  |
| 21 | 1 | 2011_67 | A    | 2 | 1283.81 | 4299.68  |
| 21 | 1 | 2011_88 | 0.0  | 1 | 2732.32 | 10057.17 |
| 21 | 1 | 2011_88 | 0.0  | 2 | 2769.00 | 8703.60  |
| 21 | 1 | 2011_88 | 0.1  | 1 | 138.24  | 214.86   |
| 21 | 1 | 2011_88 | 0.1  | 2 | 141.09  | 264.46   |
| 21 | 1 | 2011_88 | 1.0  | 1 | 117.20  | 202.83   |
| 21 | 1 | 2011_88 | 1.0  | 2 | 99.58   | 179.32   |
| 21 | 1 | 2011_88 | 5.0  | 1 | 0.58    | 0.00     |
| 21 | 1 | 2011_88 | 5.0  | 2 | 5.03    | 2.84     |

|    |   |          |      |   |         |         |
|----|---|----------|------|---|---------|---------|
| 21 | 1 | 2011_88  | 10.0 | 1 | 0.00    | 0.00    |
| 21 | 1 | 2011_88  | 10.0 | 2 | 0.00    | 0.00    |
| 21 | 1 | 2011_88  | A    | 1 | 2650.91 | 8363.06 |
| 21 | 1 | 2011_88  | A    | 2 | 2537.66 | 9386.19 |
| 21 | 1 | 2012_051 | 0.0  | 1 | 1056.62 | 3151.98 |
| 21 | 1 | 2012_051 | 0.0  | 2 | 950.98  | 2965.74 |
| 21 | 1 | 2012_051 | 0.1  | 1 | 136.51  | 230.73  |
| 21 | 1 | 2012_051 | 0.1  | 2 | 144.73  | 252.78  |
| 21 | 1 | 2012_051 | 1.0  | 1 | 92.30   | 147.63  |
| 21 | 1 | 2012_051 | 1.0  | 2 | 93.05   | 151.31  |
| 21 | 1 | 2012_051 | 5.0  | 1 | 50.54   | 42.78   |
| 21 | 1 | 2012_051 | 5.0  | 2 | .       | .       |
| 21 | 1 | 2012_051 | 10.0 | 1 | 0.00    | 0.00    |
| 21 | 1 | 2012_051 | 10.0 | 2 | 0.00    | 0.00    |
| 21 | 1 | 2012_051 | A    | 1 | 1449.23 | 4992.68 |
| 21 | 1 | 2012_051 | A    | 2 | 901.59  | 3189.90 |
| 21 | 1 | 2012_086 | 0.0  | 1 | 1664.85 | 5490.43 |
| 21 | 1 | 2012_086 | 0.0  | 2 | 1444.84 | 4720.95 |
| 21 | 1 | 2012_086 | 0.1  | 1 | 181.39  | 340.12  |
| 21 | 1 | 2012_086 | 0.1  | 2 | 183.29  | 326.21  |
| 21 | 1 | 2012_086 | 1.0  | 1 | 103.50  | 202.83  |
| 21 | 1 | 2012_086 | 1.0  | 2 | 74.68   | 97.47   |
| 21 | 1 | 2012_086 | 5.0  | 1 | 0.00    | 0.00    |
| 21 | 1 | 2012_086 | 5.0  | 2 | 10.35   | 5.35    |
| 21 | 1 | 2012_086 | 10.0 | 1 | 1.09    | 0.06    |
| 21 | 1 | 2012_086 | 10.0 | 2 | 0.00    | 0.00    |
| 21 | 1 | 2012_086 | A    | 1 | 1426.60 | 4328.78 |
| 21 | 1 | 2012_086 | A    | 2 | 1384.60 | 4388.46 |
| 21 | 1 | 2012_117 | 0.0  | 1 | 1945.68 | 5943.31 |
| 21 | 1 | 2012_117 | 0.0  | 2 | 2520.32 | 7825.73 |
| 21 | 1 | 2012_117 | 0.1  | 1 | 175.36  | 334.59  |
| 21 | 1 | 2012_117 | 0.1  | 2 | 158.71  | 265.62  |
| 21 | 1 | 2012_117 | 1.0  | 1 | 92.04   | 168.33  |
| 21 | 1 | 2012_117 | 1.0  | 2 | 120.65  | 171.10  |
| 21 | 1 | 2012_117 | 5.0  | 1 | 71.12   | 103.51  |
| 21 | 1 | 2012_117 | 5.0  | 2 | 61.16   | 73.29   |
| 21 | 1 | 2012_117 | 10.0 | 1 | 10.60   | 25.43   |
| 21 | 1 | 2012_117 | 10.0 | 2 | 24.95   | 20.43   |
| 21 | 1 | 2012_117 | A    | 1 | 1643.73 | 5270.72 |
| 21 | 1 | 2012_117 | A    | 2 | 1546.31 | 5131.39 |
| 21 | 1 | 2012_125 | 0.0  | 1 | 1481.46 | 4929.01 |

|    |   |          |      |   |         |         |
|----|---|----------|------|---|---------|---------|
| 21 | 1 | 2012_125 | 0.0  | 2 | 1446.76 | 5019.01 |
| 21 | 1 | 2012_125 | 0.1  | 1 | 149.98  | 274.35  |
| 21 | 1 | 2012_125 | 0.1  | 2 | 182.98  | 315.42  |
| 21 | 1 | 2012_125 | 1.0  | 1 | 70.45   | 92.97   |
| 21 | 1 | 2012_125 | 1.0  | 2 | 108.47  | 181.22  |
| 21 | 1 | 2012_125 | 5.0  | 1 | 3.47    | 0.18    |
| 21 | 1 | 2012_125 | 5.0  | 2 | 24.10   | 21.16   |
| 21 | 1 | 2012_125 | 10.0 | 1 | 0.00    | 0.00    |
| 21 | 1 | 2012_125 | 10.0 | 2 | 0.00    | 0.00    |
| 21 | 1 | 2012_125 | A    | 1 | 1315.95 | 4357.99 |
| 21 | 1 | 2012_125 | A    | 2 | 1497.02 | 5557.61 |
| 21 | 1 | 2012_135 | 0.0  | 1 | 740.18  | 2426.20 |
| 21 | 1 | 2012_135 | 0.0  | 2 | 732.59  | 1997.41 |
| 21 | 1 | 2012_135 | 0.1  | 1 | .       | .       |
| 21 | 1 | 2012_135 | 0.1  | 2 | 123.69  | 199.81  |
| 21 | 1 | 2012_135 | 1.0  | 1 | 91.60   | 138.72  |
| 21 | 1 | 2012_135 | 1.0  | 2 | 65.66   | 98.17   |
| 21 | 1 | 2012_135 | 5.0  | 1 | 25.72   | 26.60   |
| 21 | 1 | 2012_135 | 5.0  | 2 | 0.00    | 0.00    |
| 21 | 1 | 2012_135 | 10.0 | 1 | 0.00    | 0.00    |
| 21 | 1 | 2012_135 | 10.0 | 2 | 0.00    | 0.00    |
| 21 | 1 | 2012_135 | A    | 1 | 803.04  | 2632.98 |
| 21 | 1 | 2012_135 | A    | 2 | 719.31  | 2007.72 |
| 21 | 1 | 2013_01  | 0.0  | 1 | 1702.10 | 5566.87 |
| 21 | 1 | 2013_01  | 0.0  | 2 | 1824.35 | 6576.99 |
| 21 | 1 | 2013_01  | 0.1  | 1 | 132.45  | 171.10  |
| 21 | 1 | 2013_01  | 0.1  | 2 | 153.46  | 269.09  |
| 21 | 1 | 2013_01  | 1.0  | 1 | 86.52   | 101.18  |
| 21 | 1 | 2013_01  | 1.0  | 2 | 85.03   | 120.96  |
| 21 | 1 | 2013_01  | 5.0  | 1 | 0.00    | 0.00    |
| 21 | 1 | 2013_01  | 5.0  | 2 | 0.00    | 0.00    |
| 21 | 1 | 2013_01  | 10.0 | 1 | 0.00    | 0.00    |
| 21 | 1 | 2013_01  | 10.0 | 2 | 0.00    | 0.00    |
| 21 | 1 | 2013_01  | A    | 1 | 1879.19 | 6272.97 |
| 21 | 1 | 2013_01  | A    | 2 | 1454.85 | 4862.04 |
| 21 | 1 | 2013_03  | 0.0  | 1 | 1876.00 | 5549.69 |
| 21 | 1 | 2013_03  | 0.0  | 2 | 1883.96 | 6009.08 |
| 21 | 1 | 2013_03  | 0.1  | 1 | 142.27  | 238.06  |
| 21 | 1 | 2013_03  | 0.1  | 2 | 158.23  | 288.93  |
| 21 | 1 | 2013_03  | 1.0  | 1 | 150.99  | 233.43  |
| 21 | 1 | 2013_03  | 1.0  | 2 | 82.37   | 117.67  |

|    |   |         |      |   |         |         |
|----|---|---------|------|---|---------|---------|
| 21 | 1 | 2013_03 | 5.0  | 1 | 31.83   | 26.79   |
| 21 | 1 | 2013_03 | 5.0  | 2 | 28.48   | 23.07   |
| 21 | 1 | 2013_03 | 10.0 | 1 | 0.54    | 0.07    |
| 21 | 1 | 2013_03 | 10.0 | 2 | 1.04    | 0.16    |
| 21 | 1 | 2013_03 | A    | 1 | 1878.60 | 5764.31 |
| 21 | 1 | 2013_03 | A    | 2 | 1426.19 | 4505.47 |
| 21 | 1 | 2013_04 | 0.0  | 1 | 1728.09 | 6218.34 |
| 21 | 1 | 2013_04 | 0.0  | 2 | 1170.53 | 3749.04 |
| 21 | 1 | 2013_04 | 0.1  | 1 | 170.15  | 293.77  |
| 21 | 1 | 2013_04 | 0.1  | 2 | 162.40  | 271.42  |
| 21 | 1 | 2013_04 | 1.0  | 1 | 110.22  | 157.70  |
| 21 | 1 | 2013_04 | 1.0  | 2 | 141.81  | 205.87  |
| 21 | 1 | 2013_04 | 5.0  | 1 | 70.18   | 64.75   |
| 21 | 1 | 2013_04 | 5.0  | 2 | 72.81   | 88.08   |
| 21 | 1 | 2013_04 | 10.0 | 1 | 0.00    | 0.00    |
| 21 | 1 | 2013_04 | 10.0 | 2 | 38.10   | 27.99   |
| 21 | 1 | 2013_04 | A    | 1 | 801.94  | 2298.71 |
| 21 | 1 | 2013_04 | A    | 2 | 1846.47 | 6559.75 |
| 21 | 1 | 2013_11 | 0.0  | 1 | 1701.59 | 6141.71 |
| 21 | 1 | 2013_11 | 0.0  | 2 | 1938.69 | 7166.03 |
| 21 | 1 | 2013_11 | 0.1  | 1 | 148.95  | 241.08  |
| 21 | 1 | 2013_11 | 0.1  | 2 | 166.09  | 259.87  |
| 21 | 1 | 2013_11 | 1.0  | 1 | 112.68  | 145.05  |
| 21 | 1 | 2013_11 | 1.0  | 2 | 114.51  | 155.92  |
| 21 | 1 | 2013_11 | 5.0  | 1 | 5.67    | 2.11    |
| 21 | 1 | 2013_11 | 5.0  | 2 | 2.52    | 0.87    |
| 21 | 1 | 2013_11 | 10.0 | 1 | 0.00    | 0.00    |
| 21 | 1 | 2013_11 | 10.0 | 2 | 0.00    | 0.00    |
| 21 | 1 | 2013_11 | A    | 1 | 1897.00 | 6920.60 |
| 21 | 1 | 2013_11 | A    | 2 | 2063.37 | 6533.93 |
| 21 | 1 | 2013_18 | 0.0  | 1 | 1094.97 | 3541.46 |
| 21 | 1 | 2013_18 | 0.0  | 2 | 1730.25 | 5650.49 |
| 21 | 1 | 2013_18 | 0.1  | 1 | 155.46  | 254.47  |
| 21 | 1 | 2013_18 | 0.1  | 2 | 170.44  | 267.64  |
| 21 | 1 | 2013_18 | 1.0  | 1 | 103.90  | 136.85  |
| 21 | 1 | 2013_18 | 1.0  | 2 | 105.46  | 164.22  |
| 21 | 1 | 2013_18 | 5.0  | 1 | 20.42   | 11.46   |
| 21 | 1 | 2013_18 | 5.0  | 2 | 15.48   | 7.60    |
| 21 | 1 | 2013_18 | 10.0 | 1 | 0.00    | 0.00    |
| 21 | 1 | 2013_18 | 10.0 | 2 | 1.23    | 0.79    |
| 21 | 1 | 2013_18 | A    | 1 | 1006.35 | 2787.99 |



|    |   |         |      |   |         |          |
|----|---|---------|------|---|---------|----------|
| 21 | 1 | 2013_18 | A    | 2 | 1356.05 | 4465.11  |
| 21 | 1 | 2013_20 | 0.0  | 1 | 1763.21 | 5658.49  |
| 21 | 1 | 2013_20 | 0.0  | 2 | 2013.34 | 6299.67  |
| 21 | 1 | 2013_20 | 0.1  | 1 | 165.64  | 288.32   |
| 21 | 1 | 2013_20 | 0.1  | 2 | 144.11  | 204.09   |
| 21 | 1 | 2013_20 | 1.0  | 1 | 108.38  | 153.28   |
| 21 | 1 | 2013_20 | 1.0  | 2 | 109.19  | 163.54   |
| 21 | 1 | 2013_20 | 5.0  | 1 | 46.17   | 38.93    |
| 21 | 1 | 2013_20 | 5.0  | 2 | 39.12   | 50.01    |
| 21 | 1 | 2013_20 | 10.0 | 1 | 0.00    | 0.00     |
| 21 | 1 | 2013_20 | 10.0 | 2 | 1.07    | 0.02     |
| 21 | 1 | 2013_20 | A    | 1 | 1974.31 | 6876.43  |
| 21 | 1 | 2013_20 | A    | 2 | 2163.80 | 7536.81  |
| 21 | 2 | 2010_01 | 0.0  | 1 | 1023.80 | 2793.61  |
| 21 | 2 | 2010_01 | 0.0  | 2 | 1431.24 | 4587.94  |
| 21 | 2 | 2010_01 | 0.1  | 1 | 146.79  | 249.13   |
| 21 | 2 | 2010_01 | 0.1  | 2 | 149.59  | 275.82   |
| 21 | 2 | 2010_01 | 1.0  | 1 | 98.10   | 154.38   |
| 21 | 2 | 2010_01 | 1.0  | 2 | 68.11   | 84.30    |
| 21 | 2 | 2010_01 | 5.0  | 1 | 0.00    | 0.00     |
| 21 | 2 | 2010_01 | 5.0  | 2 | 0.00    | 0.00     |
| 21 | 2 | 2010_01 | 10.0 | 1 | 0.00    | 0.00     |
| 21 | 2 | 2010_01 | 10.0 | 2 | 0.00    | 0.00     |
| 21 | 2 | 2010_01 | A    | 1 | 1046.79 | 3376.76  |
| 21 | 2 | 2010_01 | A    | 2 | 1294.96 | 4838.59  |
| 21 | 2 | 2010_03 | 0.0  | 1 | 3043.74 | 10511.91 |
| 21 | 2 | 2010_03 | 0.0  | 2 | 1709.93 | 5886.06  |
| 21 | 2 | 2010_03 | 0.1  | 1 | 285.91  | 653.25   |
| 21 | 2 | 2010_03 | 0.1  | 2 | 314.31  | 735.42   |
| 21 | 2 | 2010_03 | 1.0  | 1 | 10.84   | 7.45     |
| 21 | 2 | 2010_03 | 1.0  | 2 | 6.58    | 5.23     |
| 21 | 2 | 2010_03 | 5.0  | 1 | 0.00    | 0.00     |
| 21 | 2 | 2010_03 | 5.0  | 2 | 0.00    | 0.00     |
| 21 | 2 | 2010_03 | 10.0 | 1 | 0.00    | 0.00     |
| 21 | 2 | 2010_03 | 10.0 | 2 | 0.00    | 0.00     |
| 21 | 2 | 2010_03 | A    | 1 | 1291.19 | 4139.65  |
| 21 | 2 | 2010_03 | A    | 2 | 2988.83 | 11028.76 |
| 21 | 2 | 2010_04 | 0.0  | 1 | .       | .        |
| 21 | 2 | 2010_04 | 0.0  | 2 | 637.15  | 1907.35  |
| 21 | 2 | 2010_04 | 0.1  | 1 | 94.21   | 162.86   |
| 21 | 2 | 2010_04 | 0.1  | 2 | 117.49  | 186.51   |

|    |   |         |      |   |         |         |
|----|---|---------|------|---|---------|---------|
| 21 | 2 | 2010_04 | 1.0  | 1 | 51.11   | 85.77   |
| 21 | 2 | 2010_04 | 1.0  | 2 | 55.59   | 67.49   |
| 21 | 2 | 2010_04 | 5.0  | 1 | 0.00    | 0.00    |
| 21 | 2 | 2010_04 | 5.0  | 2 | 0.00    | 0.00    |
| 21 | 2 | 2010_04 | 10.0 | 1 | .       | .       |
| 21 | 2 | 2010_04 | 10.0 | 2 | 0.00    | 0.00    |
| 21 | 2 | 2010_04 | A    | 1 | 606.16  | 1849.74 |
| 21 | 2 | 2010_04 | A    | 2 | .       | .       |
| 21 | 2 | 2010_06 | 0.0  | 1 | 1007.11 | 2817.08 |
| 21 | 2 | 2010_06 | 0.0  | 2 | 726.54  | 1996.62 |
| 21 | 2 | 2010_06 | 0.1  | 1 | 143.96  | 245.78  |
| 21 | 2 | 2010_06 | 0.1  | 2 | 165.78  | 297.12  |
| 21 | 2 | 2010_06 | 1.0  | 1 | 84.09   | 127.08  |
| 21 | 2 | 2010_06 | 1.0  | 2 | 95.98   | 158.14  |
| 21 | 2 | 2010_06 | 5.0  | 1 | 0.00    | 0.00    |
| 21 | 2 | 2010_06 | 5.0  | 2 | 0.00    | 0.00    |
| 21 | 2 | 2010_06 | 10.0 | 1 | 0.00    | 0.00    |
| 21 | 2 | 2010_06 | 10.0 | 2 | 1.45    | 0.02    |
| 21 | 2 | 2010_06 | A    | 1 | 1202.67 | 3494.15 |
| 21 | 2 | 2010_06 | A    | 2 | 1180.03 | 3600.77 |
| 21 | 2 | 2010_08 | 0.0  | 1 | 1300.50 | 4216.40 |
| 21 | 2 | 2010_08 | 0.0  | 2 | 735.48  | 2254.73 |
| 21 | 2 | 2010_08 | 0.1  | 1 | 154.11  | 283.23  |
| 21 | 2 | 2010_08 | 0.1  | 2 | 126.36  | 195.82  |
| 21 | 2 | 2010_08 | 1.0  | 1 | 65.04   | 80.28   |
| 21 | 2 | 2010_08 | 1.0  | 2 | 47.88   | 54.11   |
| 21 | 2 | 2010_08 | 5.0  | 1 | 2.01    | 0.00    |
| 21 | 2 | 2010_08 | 5.0  | 2 | 0.33    | 0.01    |
| 21 | 2 | 2010_08 | 10.0 | 1 | 0.00    | 0.00    |
| 21 | 2 | 2010_08 | 10.0 | 2 | 0.00    | 0.00    |
| 21 | 2 | 2010_08 | A    | 1 | 1533.42 | 4858.33 |
| 21 | 2 | 2010_08 | A    | 2 | 1587.88 | 4911.60 |
| 21 | 2 | 2010_10 | 0.0  | 1 | 915.88  | 2864.31 |
| 21 | 2 | 2010_10 | 0.0  | 2 | 1623.09 | 5348.21 |
| 21 | 2 | 2010_10 | 0.1  | 1 | 138.58  | 210.73  |
| 21 | 2 | 2010_10 | 0.1  | 2 | 124.27  | 211.76  |
| 21 | 2 | 2010_10 | 1.0  | 1 | 51.03   | 50.27   |
| 21 | 2 | 2010_10 | 1.0  | 2 | 76.05   | 98.52   |
| 21 | 2 | 2010_10 | 5.0  | 1 | 27.79   | 39.37   |
| 21 | 2 | 2010_10 | 5.0  | 2 | 14.66   | 6.88    |
| 21 | 2 | 2010_10 | 10.0 | 1 | 0.00    | 0.00    |

|    |   |         |      |   |         |         |
|----|---|---------|------|---|---------|---------|
| 21 | 2 | 2010_10 | 10.0 | 2 | 0.00    | 0.00    |
| 21 | 2 | 2010_10 | A    | 1 | 1431.27 | 4880.60 |
| 21 | 2 | 2010_10 | A    | 2 | 826.16  | 2516.96 |
| 21 | 2 | 2011_02 | 0.0  | 1 | 1698.42 | 5977.52 |
| 21 | 2 | 2011_02 | 0.0  | 2 | 1944.65 | 6399.95 |
| 21 | 2 | 2011_02 | 0.1  | 1 | 188.07  | 419.82  |
| 21 | 2 | 2011_02 | 0.1  | 2 | 147.18  | 268.22  |
| 21 | 2 | 2011_02 | 1.0  | 1 | 83.78   | 80.91   |
| 21 | 2 | 2011_02 | 1.0  | 2 | 65.22   | 80.91   |
| 21 | 2 | 2011_02 | 5.0  | 1 | 3.24    | 0.15    |
| 21 | 2 | 2011_02 | 5.0  | 2 | 0.00    | 0.00    |
| 21 | 2 | 2011_02 | 10.0 | 1 | 0.00    | 0.00    |
| 21 | 2 | 2011_02 | 10.0 | 2 | 0.08    | 0.27    |
| 21 | 2 | 2011_02 | A    | 1 | 2005.72 | 6737.51 |
| 21 | 2 | 2011_02 | A    | 2 | 1937.43 | 6664.96 |
| 21 | 2 | 2011_15 | 0.0  | 1 | 1464.06 | 4724.60 |
| 21 | 2 | 2011_15 | 0.0  | 2 | 1368.25 | 4859.57 |
| 21 | 2 | 2011_15 | 0.1  | 1 | 141.92  | 204.09  |
| 21 | 2 | 2011_15 | 0.1  | 2 | 127.11  | 192.85  |
| 21 | 2 | 2011_15 | 1.0  | 1 | 39.55   | 64.47   |
| 21 | 2 | 2011_15 | 1.0  | 2 | 59.17   | 64.47   |
| 21 | 2 | 2011_15 | 5.0  | 1 | 0.00    | 0.00    |
| 21 | 2 | 2011_15 | 5.0  | 2 | 0.00    | 0.00    |
| 21 | 2 | 2011_15 | 10.0 | 1 | 0.33    | 0.10    |
| 21 | 2 | 2011_15 | 10.0 | 2 | 0.81    | 0.00    |
| 21 | 2 | 2011_15 | A    | 1 | 1567.77 | 5393.67 |
| 21 | 2 | 2011_15 | A    | 2 | 1035.54 | 3051.29 |
| 21 | 2 | 2011_63 | 0.0  | 1 | 1401.66 | 4586.74 |
| 21 | 2 | 2011_63 | 0.0  | 2 | 1267.76 | 3778.40 |
| 21 | 2 | 2011_63 | 0.1  | 1 | 195.64  | 345.37  |
| 21 | 2 | 2011_63 | 0.1  | 2 | 215.05  | 453.90  |
| 21 | 2 | 2011_63 | 1.0  | 1 | 90.20   | 152.62  |
| 21 | 2 | 2011_63 | 1.0  | 2 | 119.45  | 246.61  |
| 21 | 2 | 2011_63 | 5.0  | 1 | 21.61   | 16.26   |
| 21 | 2 | 2011_63 | 5.0  | 2 | 8.62    | 4.41    |
| 21 | 2 | 2011_63 | 10.0 | 1 | 0.00    | 0.00    |
| 21 | 2 | 2011_63 | 10.0 | 2 | 0.78    | 0.05    |
| 21 | 2 | 2011_63 | A    | 1 | 1406.18 | 4942.71 |
| 21 | 2 | 2011_63 | A    | 2 | 1379.79 | 4816.42 |
| 21 | 2 | 2011_67 | 0.0  | 1 | 1312.55 | 3857.25 |
| 21 | 2 | 2011_67 | 0.0  | 2 | 1323.96 | 4391.98 |

|    |   |          |      |   |         |         |
|----|---|----------|------|---|---------|---------|
| 21 | 2 | 2011_67  | 0.1  | 1 | 162.41  | 314.47  |
| 21 | 2 | 2011_67  | 0.1  | 2 | 159.33  | 310.40  |
| 21 | 2 | 2011_67  | 1.0  | 1 | 106.16  | 174.13  |
| 21 | 2 | 2011_67  | 1.0  | 2 | 91.79   | 119.40  |
| 21 | 2 | 2011_67  | 5.0  | 1 | 0.00    | 0.00    |
| 21 | 2 | 2011_67  | 5.0  | 2 | 0.00    | 0.00    |
| 21 | 2 | 2011_67  | 10.0 | 1 | 0.00    | 0.00    |
| 21 | 2 | 2011_67  | 10.0 | 2 | 0.40    | 0.00    |
| 21 | 2 | 2011_67  | A    | 1 | 1081.90 | 2815.19 |
| 21 | 2 | 2011_67  | A    | 2 | 1819.24 | 6489.60 |
| 21 | 2 | 2011_88  | 0.0  | 1 | 2401.38 | 8700.30 |
| 21 | 2 | 2011_88  | 0.0  | 2 | 2326.85 | 7596.94 |
| 21 | 2 | 2011_88  | 0.1  | 1 | 100.17  | 131.31  |
| 21 | 2 | 2011_88  | 0.1  | 2 | 103.00  | 146.98  |
| 21 | 2 | 2011_88  | 1.0  | 1 | 54.54   | 66.91   |
| 21 | 2 | 2011_88  | 1.0  | 2 | 66.97   | 94.17   |
| 21 | 2 | 2011_88  | 5.0  | 1 | 0.00    | 0.00    |
| 21 | 2 | 2011_88  | 5.0  | 2 | 0.00    | 0.00    |
| 21 | 2 | 2011_88  | 10.0 | 1 | 1.03    | 0.12    |
| 21 | 2 | 2011_88  | 10.0 | 2 | 0.00    | 0.00    |
| 21 | 2 | 2011_88  | A    | 1 | 1931.39 | 6496.74 |
| 21 | 2 | 2011_88  | A    | 2 | 2274.06 | 7649.56 |
| 21 | 2 | 2012_051 | 0.0  | 1 | 1176.97 | 3723.04 |
| 21 | 2 | 2012_051 | 0.0  | 2 | 1154.08 | 3847.35 |
| 21 | 2 | 2012_051 | 0.1  | 1 | 155.29  | 298.34  |
| 21 | 2 | 2012_051 | 0.1  | 2 | 140.34  | 280.55  |
| 21 | 2 | 2012_051 | 1.0  | 1 | 61.06   | 68.08   |
| 21 | 2 | 2012_051 | 1.0  | 2 | 60.17   | 95.03   |
| 21 | 2 | 2012_051 | 5.0  | 1 | 2.72    | 0.25    |
| 21 | 2 | 2012_051 | 5.0  | 2 | 0.00    | 0.00    |
| 21 | 2 | 2012_051 | 10.0 | 1 | 0.00    | 0.00    |
| 21 | 2 | 2012_051 | 10.0 | 2 | 1.50    | 0.00    |
| 21 | 2 | 2012_051 | A    | 1 | 1502.17 | 4848.46 |
| 21 | 2 | 2012_051 | A    | 2 | 1519.91 | 4452.10 |
| 21 | 2 | 2012_086 | 0.0  | 1 | 1593.38 | 4734.36 |
| 21 | 2 | 2012_086 | 0.0  | 2 | .       | .       |
| 21 | 2 | 2012_086 | 0.1  | 1 | 120.70  | 163.77  |
| 21 | 2 | 2012_086 | 0.1  | 2 | 161.84  | 263.60  |
| 21 | 2 | 2012_086 | 1.0  | 1 | 68.59   | 93.48   |
| 21 | 2 | 2012_086 | 1.0  | 2 | .       | .       |
| 21 | 2 | 2012_086 | 5.0  | 1 | 7.03    | 2.14    |

|    |   |          |      |   |         |         |
|----|---|----------|------|---|---------|---------|
| 21 | 2 | 2012_086 | 5.0  | 2 | .       | .       |
| 21 | 2 | 2012_086 | 10.0 | 1 | 2.50    | 0.00    |
| 21 | 2 | 2012_086 | 10.0 | 2 | .       | .       |
| 21 | 2 | 2012_086 | A    | 1 | 1315.92 | 4198.01 |
| 21 | 2 | 2012_086 | A    | 2 | .       | .       |
| 21 | 2 | 2012_117 | 0.0  | 1 | 1615.71 | 6407.04 |
| 21 | 2 | 2012_117 | 0.0  | 2 | 1187.72 | 4368.52 |
| 21 | 2 | 2012_117 | 0.1  | 1 | 112.98  | 175.54  |
| 21 | 2 | 2012_117 | 0.1  | 2 | 98.74   | 163.99  |
| 21 | 2 | 2012_117 | 1.0  | 1 | 56.97   | 84.95   |
| 21 | 2 | 2012_117 | 1.0  | 2 | 55.86   | 55.29   |
| 21 | 2 | 2012_117 | 5.0  | 1 | 22.88   | 16.33   |
| 21 | 2 | 2012_117 | 5.0  | 2 | 25.11   | 29.80   |
| 21 | 2 | 2012_117 | 10.0 | 1 | 0.00    | 0.00    |
| 21 | 2 | 2012_117 | 10.0 | 2 | 0.00    | 0.00    |
| 21 | 2 | 2012_117 | A    | 1 | 1826.86 | 6209.96 |
| 21 | 2 | 2012_117 | A    | 2 | 1415.10 | 4859.57 |
| 21 | 2 | 2012_125 | 0.0  | 1 | 1001.77 | 3159.94 |
| 21 | 2 | 2012_125 | 0.0  | 2 | .       | .       |
| 21 | 2 | 2012_125 | 0.1  | 1 | 147.79  | 270.55  |
| 21 | 2 | 2012_125 | 0.1  | 2 | 145.76  | 233.98  |
| 21 | 2 | 2012_125 | 1.0  | 1 | 81.01   | 108.43  |
| 21 | 2 | 2012_125 | 1.0  | 2 | 90.43   | 131.31  |
| 21 | 2 | 2012_125 | 5.0  | 1 | 1.24    | 0.00    |
| 21 | 2 | 2012_125 | 5.0  | 2 | 0.00    | 0.00    |
| 21 | 2 | 2012_125 | 10.0 | 1 | 0.08    | 0.01    |
| 21 | 2 | 2012_125 | 10.0 | 2 | 0.81    | 0.03    |
| 21 | 2 | 2012_125 | A    | 1 | 787.11  | 2026.83 |
| 21 | 2 | 2012_125 | A    | 2 | 1188.67 | 3987.12 |
| 21 | 2 | 2012_135 | 0.0  | 1 | 662.65  | 1811.07 |
| 21 | 2 | 2012_135 | 0.0  | 2 | .       | .       |
| 21 | 2 | 2012_135 | 0.1  | 1 | 121.92  | 232.89  |
| 21 | 2 | 2012_135 | 0.1  | 2 | 91.29   | 154.38  |
| 21 | 2 | 2012_135 | 1.0  | 1 | 55.26   | 61.51   |
| 21 | 2 | 2012_135 | 1.0  | 2 | .       | .       |
| 21 | 2 | 2012_135 | 5.0  | 1 | 32.91   | 20.11   |
| 21 | 2 | 2012_135 | 5.0  | 2 | .       | .       |
| 21 | 2 | 2012_135 | 10.0 | 1 | 0.57    | 0.32    |
| 21 | 2 | 2012_135 | 10.0 | 2 | .       | .       |
| 21 | 2 | 2012_135 | A    | 1 | 753.07  | 2268.22 |
| 21 | 2 | 2012_135 | A    | 2 | .       | .       |

|    |   |         |      |   |         |         |
|----|---|---------|------|---|---------|---------|
| 21 | 2 | 2013_01 | 0.0  | 1 | 1549.81 | 5181.03 |
| 21 | 2 | 2013_01 | 0.0  | 2 | 1359.02 | 4044.41 |
| 21 | 2 | 2013_01 | 0.1  | 1 | 105.34  | 178.60  |
| 21 | 2 | 2013_01 | 0.1  | 2 | 171.41  | 293.16  |
| 21 | 2 | 2013_01 | 1.0  | 1 | 61.51   | 76.98   |
| 21 | 2 | 2013_01 | 1.0  | 2 | 58.79   | 65.61   |
| 21 | 2 | 2013_01 | 5.0  | 1 | 0.00    | 0.00    |
| 21 | 2 | 2013_01 | 5.0  | 2 | 0.08    | 0.04    |
| 21 | 2 | 2013_01 | 10.0 | 1 | 0.00    | 0.00    |
| 21 | 2 | 2013_01 | 10.0 | 2 | 0.79    | 0.00    |
| 21 | 2 | 2013_01 | A    | 1 | 916.74  | 3059.13 |
| 21 | 2 | 2013_01 | A    | 2 | 1192.63 | 3561.53 |
| 21 | 2 | 2013_03 | 0.0  | 1 | 1912.22 | 6768.10 |
| 21 | 2 | 2013_03 | 0.0  | 2 | .       | .       |
| 21 | 2 | 2013_03 | 0.1  | 1 | 135.22  | 256.17  |
| 21 | 2 | 2013_03 | 0.1  | 2 | 133.07  | 219.30  |
| 21 | 2 | 2013_03 | 1.0  | 1 | 119.48  | 193.84  |
| 21 | 2 | 2013_03 | 1.0  | 2 | 59.39   | 76.20   |
| 21 | 2 | 2013_03 | 5.0  | 1 | 33.64   | 28.56   |
| 21 | 2 | 2013_03 | 5.0  | 2 | 29.47   | 27.81   |
| 21 | 2 | 2013_03 | 10.0 | 1 | 0.00    | 0.00    |
| 21 | 2 | 2013_03 | 10.0 | 2 | .       | .       |
| 21 | 2 | 2013_03 | A    | 1 | 1667.59 | 5239.88 |
| 21 | 2 | 2013_03 | A    | 2 | .       | .       |
| 21 | 2 | 2013_04 | 0.0  | 1 | 2363.18 | 8450.82 |
| 21 | 2 | 2013_04 | 0.0  | 2 | 2033.05 | 7047.98 |
| 21 | 2 | 2013_04 | 0.1  | 1 | 176.26  | 366.44  |
| 21 | 2 | 2013_04 | 0.1  | 2 | .       | .       |
| 21 | 2 | 2013_04 | 1.0  | 1 | 110.53  | 186.75  |
| 21 | 2 | 2013_04 | 1.0  | 2 | 104.10  | 149.79  |
| 21 | 2 | 2013_04 | 5.0  | 1 | 0.00    | 0.00    |
| 21 | 2 | 2013_04 | 5.0  | 2 | 0.53    | 0.01    |
| 21 | 2 | 2013_04 | 10.0 | 1 | 1.51    | 0.04    |
| 21 | 2 | 2013_04 | 10.0 | 2 | 2.01    | 0.03    |
| 21 | 2 | 2013_04 | A    | 1 | 1738.48 | 5920.11 |
| 21 | 2 | 2013_04 | A    | 2 | 1512.17 | 5197.63 |
| 21 | 2 | 2013_11 | 0.0  | 1 | 1169.15 | 3893.66 |
| 21 | 2 | 2013_11 | 0.0  | 2 | 1289.61 | 4235.99 |
| 21 | 2 | 2013_11 | 0.1  | 1 | 153.78  | 216.16  |
| 21 | 2 | 2013_11 | 0.1  | 2 | 149.58  | 246.61  |
| 21 | 2 | 2013_11 | 1.0  | 1 | 97.49   | 133.14  |

|    |   |         |      |   |         |         |
|----|---|---------|------|---|---------|---------|
| 21 | 2 | 2013_11 | 1.0  | 2 | 108.30  | 202.32  |
| 21 | 2 | 2013_11 | 5.0  | 1 | 0.00    | 0.00    |
| 21 | 2 | 2013_11 | 5.0  | 2 | 0.00    | 0.00    |
| 21 | 2 | 2013_11 | 10.0 | 1 | 0.00    | 0.00    |
| 21 | 2 | 2013_11 | 10.0 | 2 | 0.00    | 0.00    |
| 21 | 2 | 2013_11 | A    | 1 | 974.42  | 3429.49 |
| 21 | 2 | 2013_11 | A    | 2 | 1751.71 | 5658.49 |
| 21 | 2 | 2013_18 | 0.0  | 1 | 1582.31 | 5006.46 |
| 21 | 2 | 2013_18 | 0.0  | 2 | 645.79  | 1830.73 |
| 21 | 2 | 2013_18 | 0.1  | 1 | 144.31  | 278.18  |
| 21 | 2 | 2013_18 | 0.1  | 2 | 142.87  | 251.37  |
| 21 | 2 | 2013_18 | 1.0  | 1 | 105.46  | 163.99  |
| 21 | 2 | 2013_18 | 1.0  | 2 | 101.78  | 148.06  |
| 21 | 2 | 2013_18 | 5.0  | 1 | 16.15   | 5.23    |
| 21 | 2 | 2013_18 | 5.0  | 2 | 16.31   | 13.14   |
| 21 | 2 | 2013_18 | 10.0 | 1 | 0.00    | 0.00    |
| 21 | 2 | 2013_18 | 10.0 | 2 | 4.69    | 0.06    |
| 21 | 2 | 2013_18 | A    | 1 | 1025.33 | 3320.35 |
| 21 | 2 | 2013_18 | A    | 2 | 1305.83 | 4120.28 |
| 21 | 2 | 2013_20 | 0.0  | 1 | 902.03  | 2614.82 |
| 21 | 2 | 2013_20 | 0.0  | 2 | 683.52  | 1917.43 |
| 21 | 2 | 2013_20 | 0.1  | 1 | 186.96  | 306.35  |
| 21 | 2 | 2013_20 | 0.1  | 2 | 166.79  | 274.65  |
| 21 | 2 | 2013_20 | 1.0  | 1 | 105.67  | 151.75  |
| 21 | 2 | 2013_20 | 1.0  | 2 | 112.46  | 163.99  |
| 21 | 2 | 2013_20 | 5.0  | 1 | 1.24    | 0.04    |
| 21 | 2 | 2013_20 | 5.0  | 2 | 0.00    | 0.00    |
| 21 | 2 | 2013_20 | 10.0 | 1 | 0.00    | 0.00    |
| 21 | 2 | 2013_20 | 10.0 | 2 | 2.48    | 0.00    |
| 21 | 2 | 2013_20 | A    | 1 | 1417.97 | 4432.01 |
| 21 | 2 | 2013_20 | A    | 2 | 824.80  | 2777.70 |
